# Supplementary material for: Lenalidomide promotes the development of TP53-mutated therapy-related myeloid neoplasms
Source: PubMed Central journal article supplement — Blood. 2022 May 6;140(16):1753–63. doi: 10.1182/blood.2021014956 (PMC9837415; doi:10.1182/blood.2021014956), 2022-05-06
Supplement: BLOOD_BLD-2021-014956-mmc1.pdf [file BLOOD_BLD-2021-014956-mmc1.pdf]

A

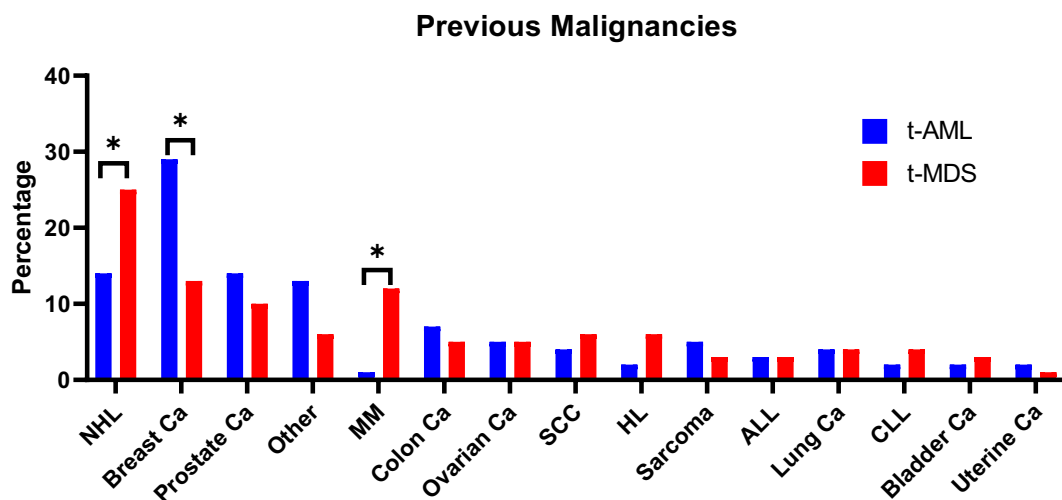

B

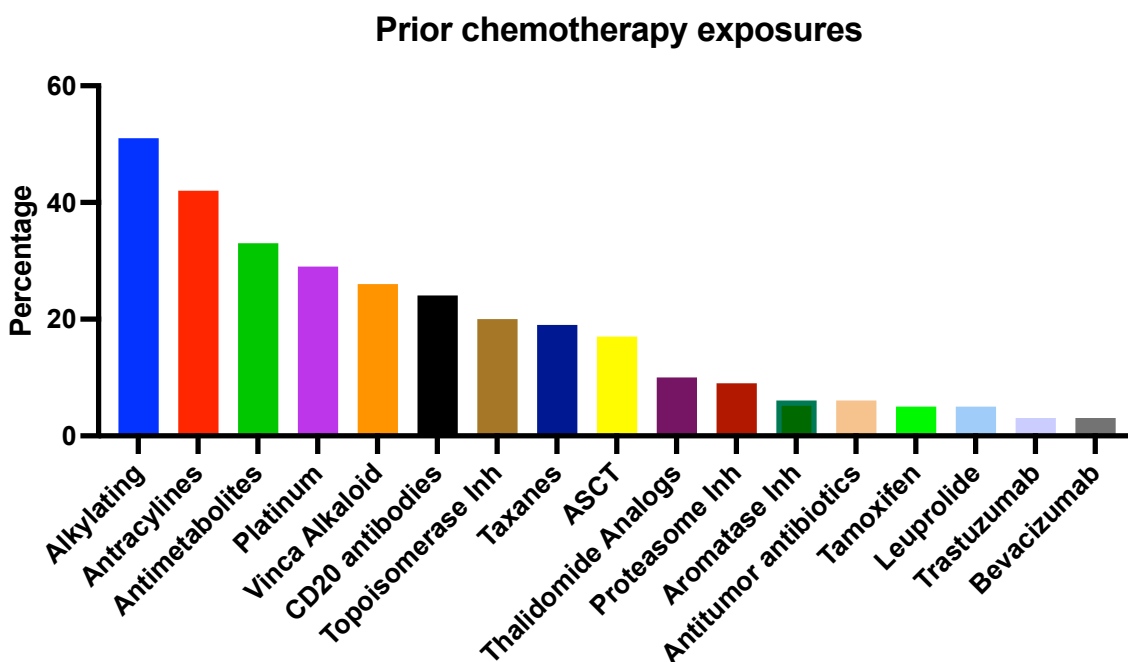

**Supplementary Figure S1.** Detailed information on primary cancers and exposures in 416 t-MN patients. (A) Frequency of primary cancers (B) Frequency of prior exposures.

**Abbreviations:** t-AML: therapy-related acute myeloid leukemia, t-MDS: therapy-related myelodysplastic syndrome, NHL: non-Hodgkin lymphoma, Ca: cancer, SCC: squamous cell carcinoma, HL: Hodgkin lymphoma, ALL: acute lymphocytic leukemia, Lung Ca: lung carcinoma, CLL: chronic lymphocytic leukemia, Bladder Ca: bladder carcinoma, Uterine Ca: uterine carcinoma, ASCT: autologous stem cell transplant. (\*) P value < 0.01 between t-AML vs. t-MDS.

**A**

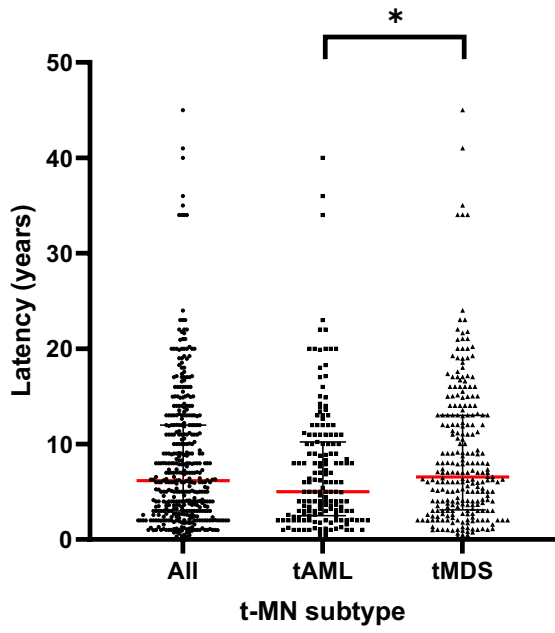

**B**

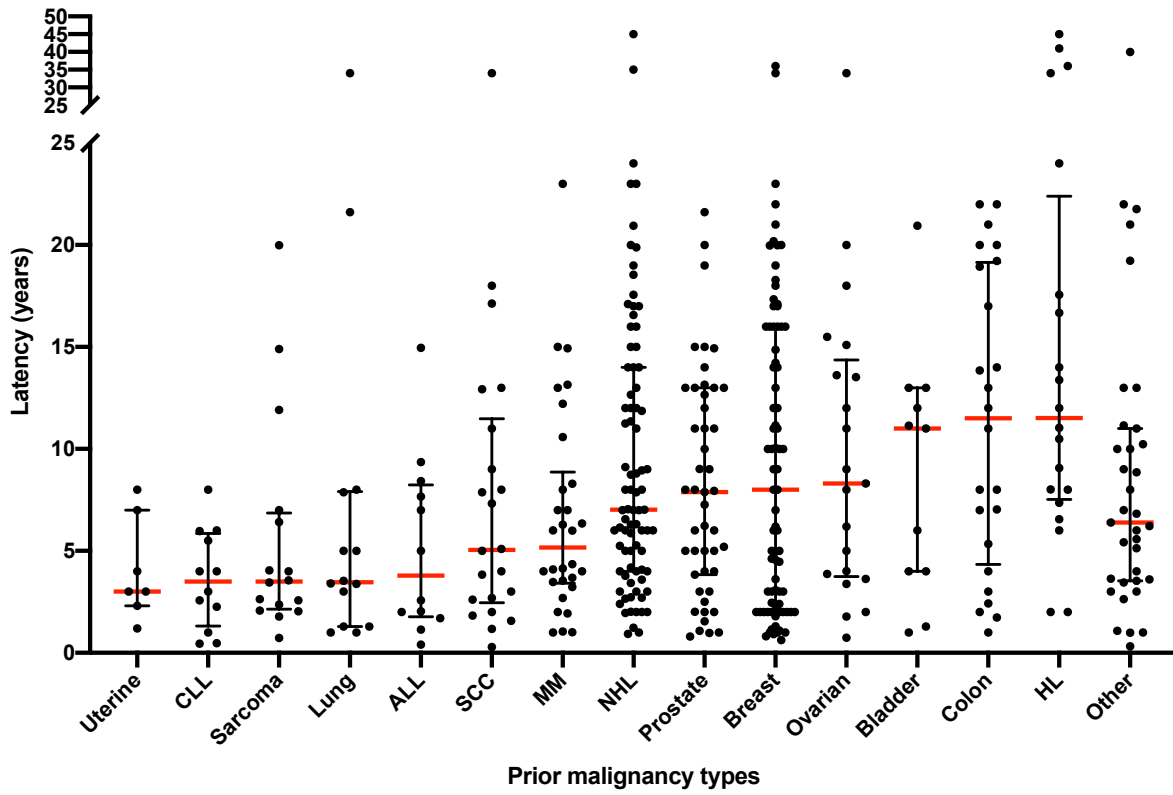

C

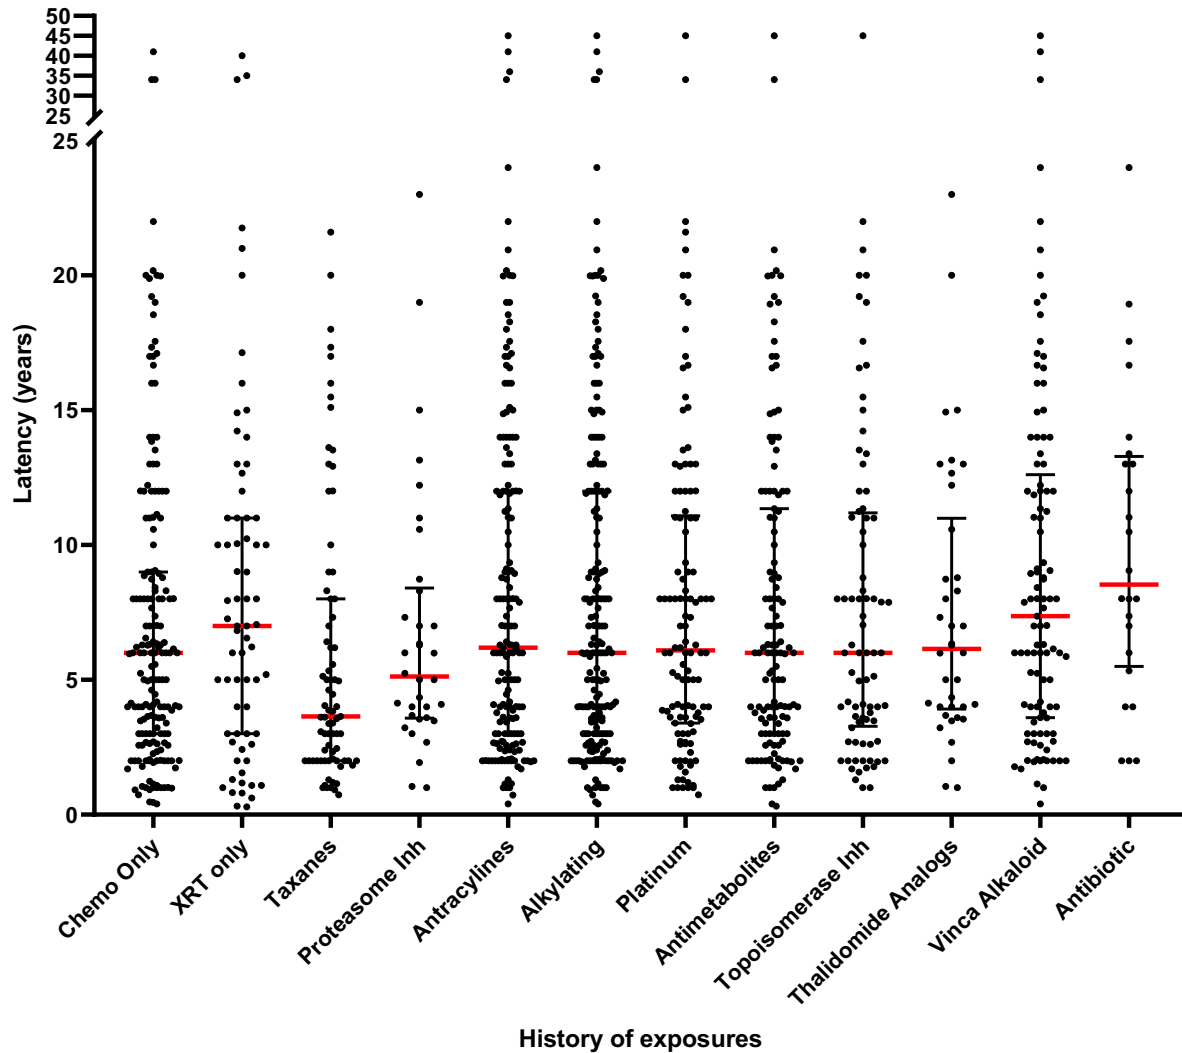

**Supplementary Figure S2.** Latency to t-MN development. (A) In all patients and based on t-AML or t-MDS subtype, (B) Latency from the diagnosis of initial primary cancer. (C) Latency from the initial exposure. The red lines indicate median. The bottom whiskers and the top whiskers indicate first and third quartiles, respectively. The red line indicates median. The error bar indicates interquartile range. \*  $P < 0.05$

**Abbreviations:** CLL: chronic lymphocytic leukemia, ALL: acute lymphocytic leukemia, MM: Multiple myeloma, NHL: non-Hodgkin lymphoma, HL: Hodgkin lymphoma, XRT: radiation.

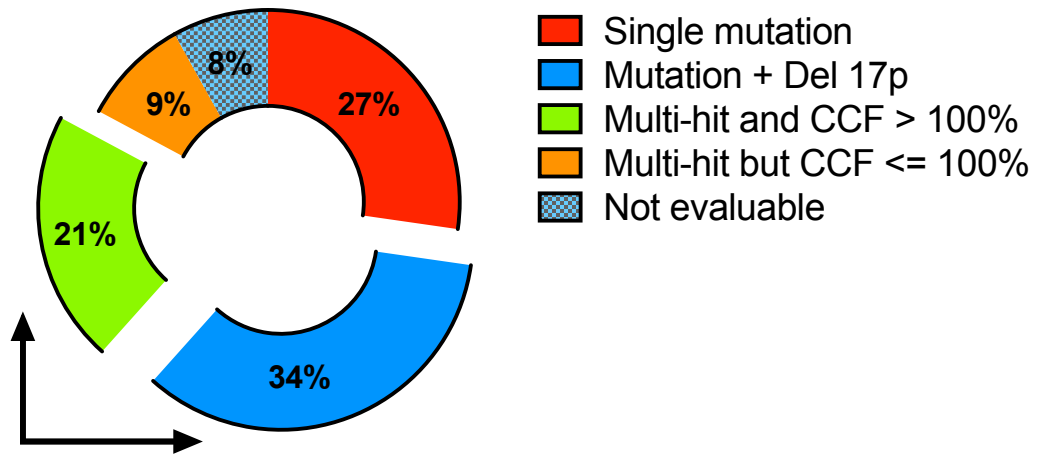

Likely bi-allelic involvement

**Supplementary Figure S3. Allelic status of *TP53* mutations.** Allelic status of *TP53* mutations were inferred based on the cooccurrence of deletion 17p and cancer cell fraction (CCF) of the mutations calculated from variant allele frequency (VAF). Co-occurrence of *TP53* mutations with deletion 17p or multi-hit *TP53* mutations with total CCF exceeding 100% were considered as likely bi-allelic involvement.

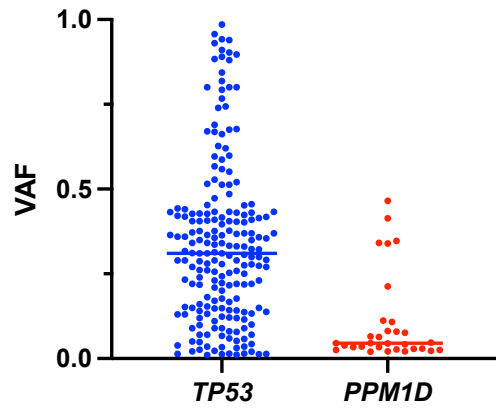

**Supplementary Figure S4.** The variant allele frequency (VAF) of *TP53* and *PPM1D* mutations. The line indicates median (*TP53* median VAF 0.31, *PPM1D* median VAF 0.045)





C

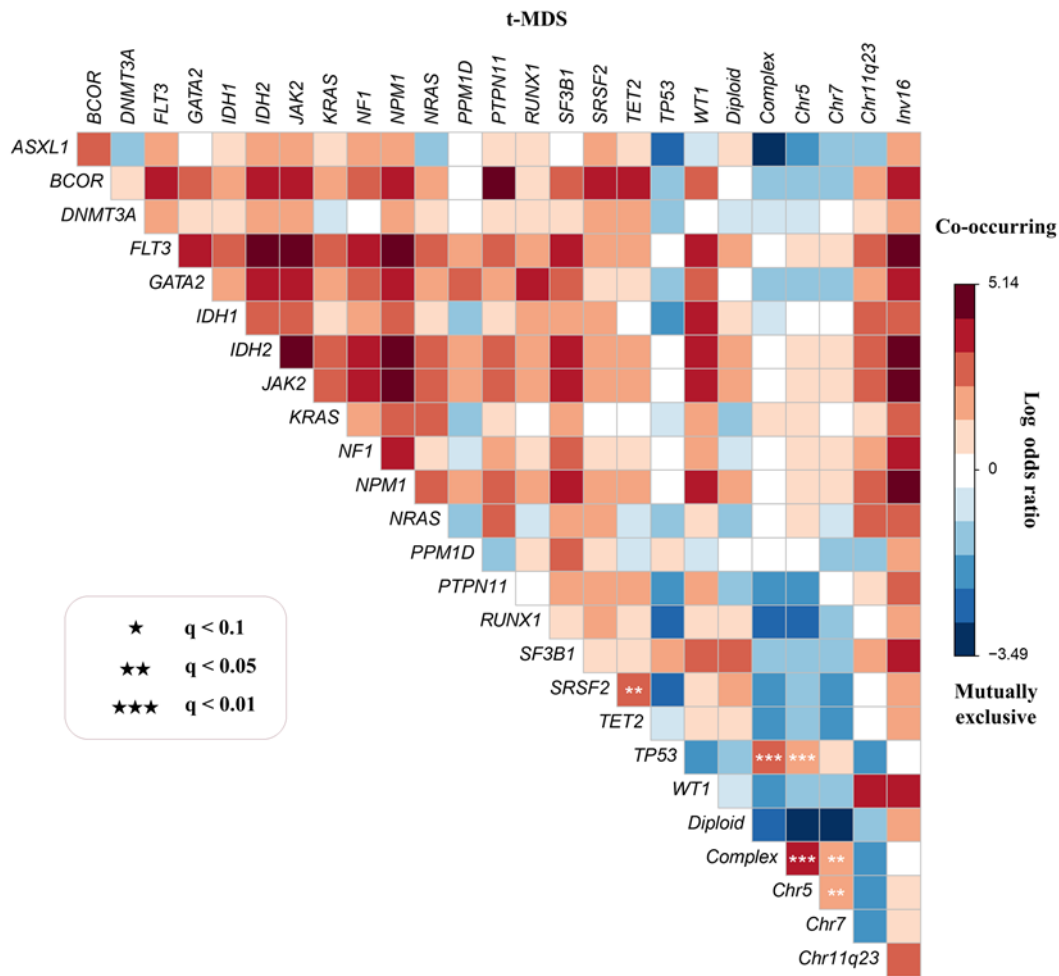

**Supplementary Figure S5.** Pair-wise analysis of mutation co-occurrence and mutual exclusivity among (A) 416 t-MN patients, (B) 167 t-AML, and (C) 249 t-MDS patients. Clonal relationship between two mutations are shown as log odds ratio. Red color indicates co-occurrence and blue color indicates mutual exclusivity. Statistical significance is described with q value (false discovery rate).



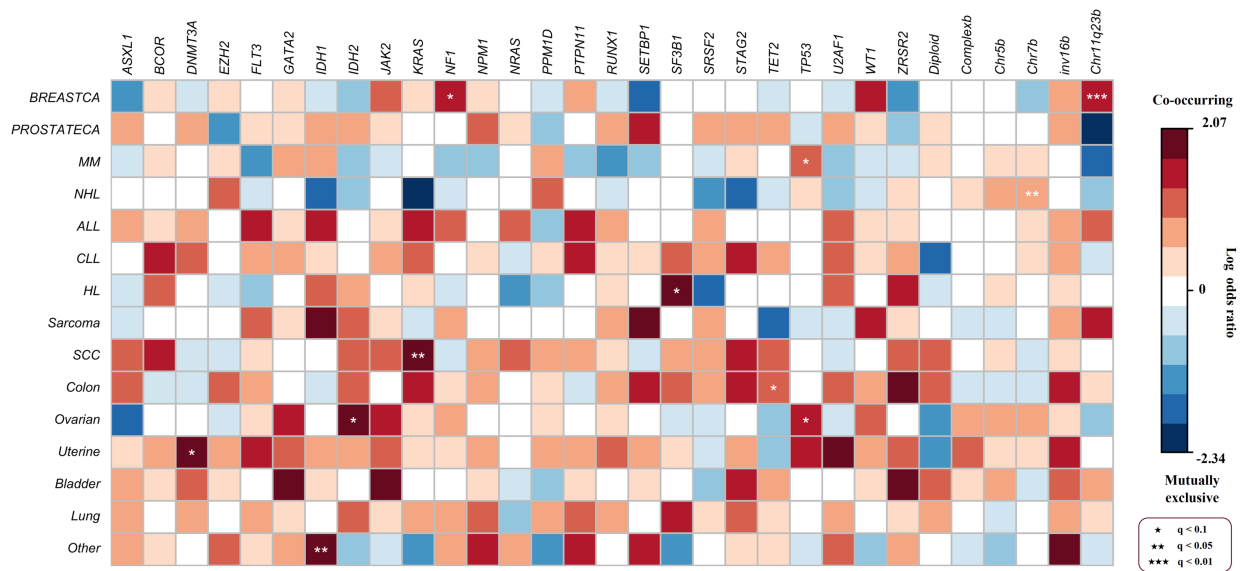

**Supplementary Figure S6.** Correlation between gene mutations and primary malignancies. Association is shown as log odds ratio. Red color indicates positive correlation and blue color indicates negative correlation. Statistical significance is shown with q value (false discovery rate).

BREASTCA: breast cancer, PROSTATECA: prostate cancer, MM: multiple myeloma, NHL: non-Hodgkin's lymphoma, ALL: acute lymphoblastic leukemia, CLL: chronic lymphocytic leukemia, HL: Hodgkin's lymphoma, SCC: squamous cell carcinoma of head and neck including esophagus.

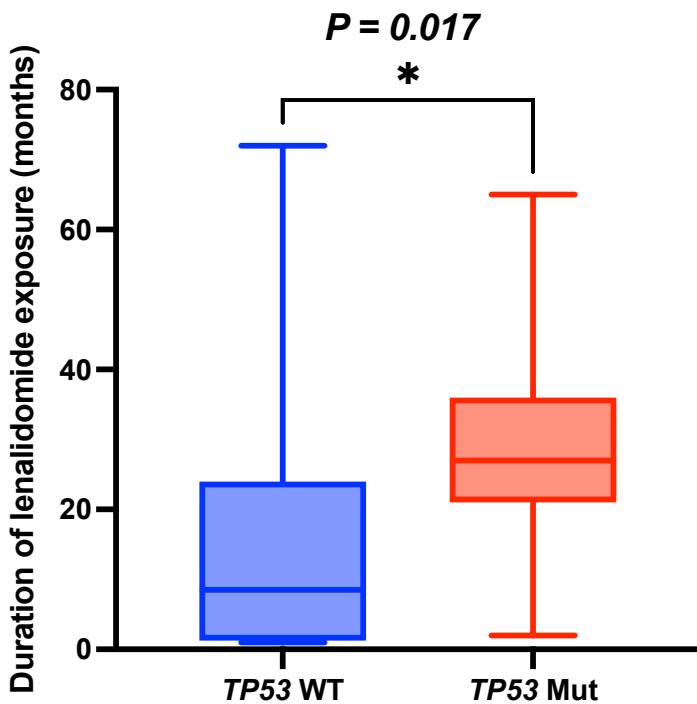

**Supplementary Figure S7. Duration of exposure to lenalidomide is associated with *TP53* mutation status in t-MN.** t-MN patients with *TP53* mutations had significantly longer duration of exposure to lenalidomide (median 27 months vs. 8.5 months,  $P = 0.017$ , Mann-Whitney test).

**A**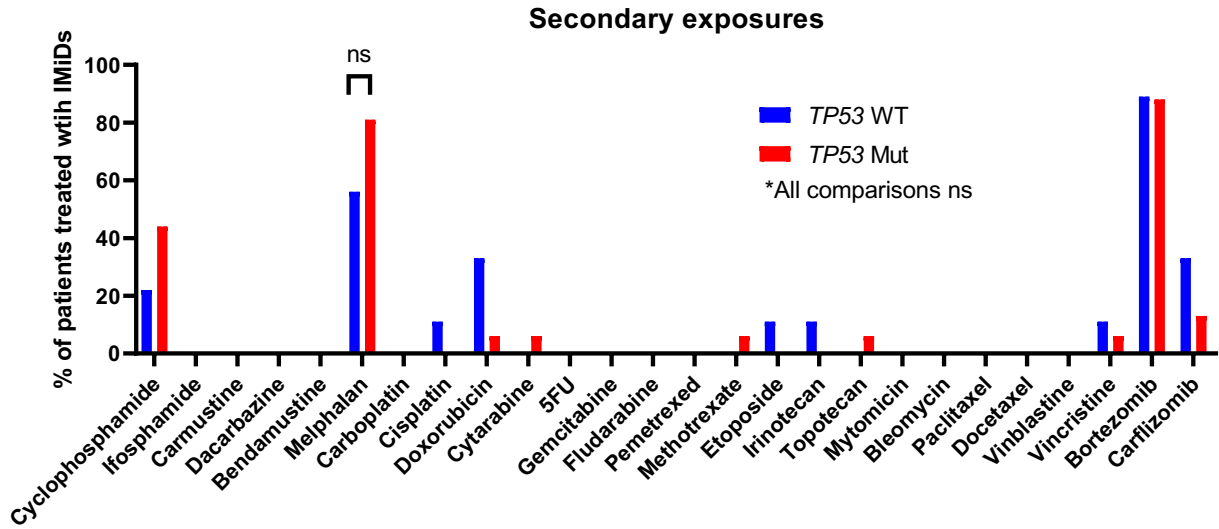**B**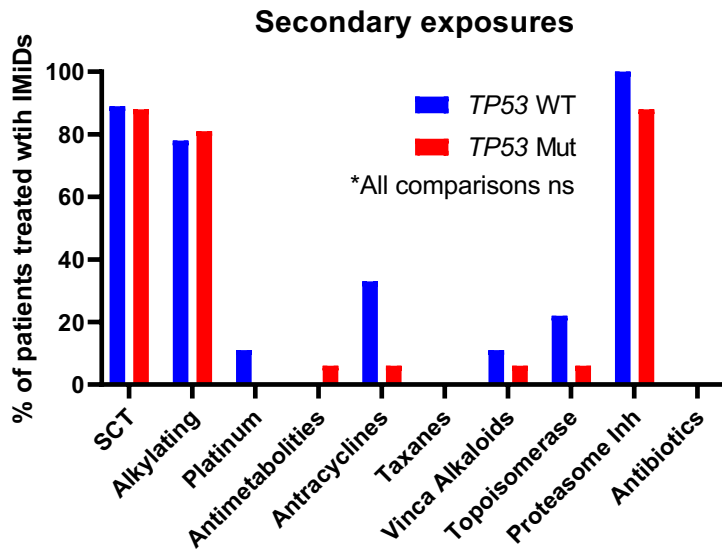

**Supplementary Figure S8. Secondary exposures in multiple myeloma (MM) patients treated with thalidomide analogs and developed t-MNs.** There were no statistical difference in secondary exposures between patients developed t-MNs with *TP53* mutations and without the mutations. **(A)** is by actual drugs. **(B)** is by drug class.

**A**

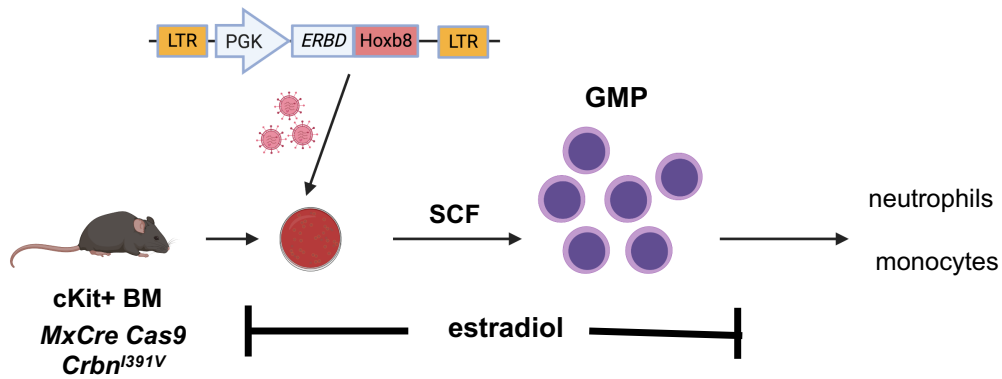

**B**

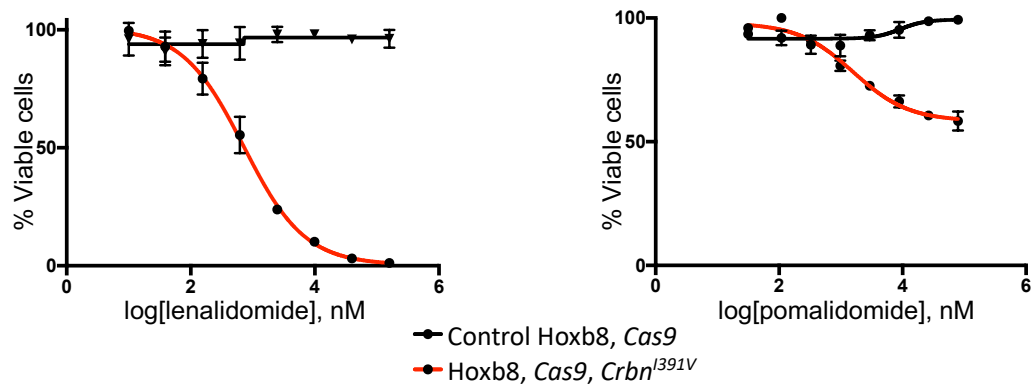

**C**

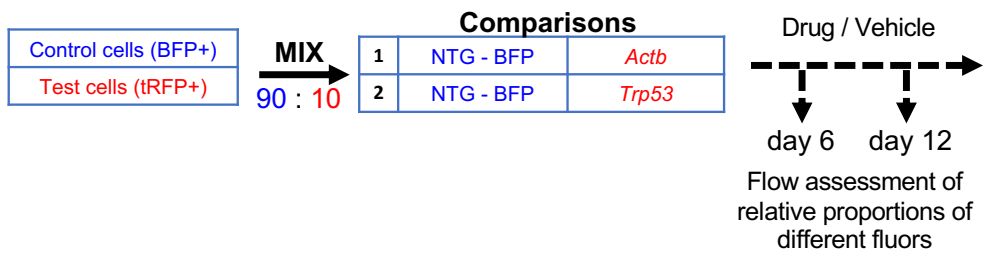

**D**

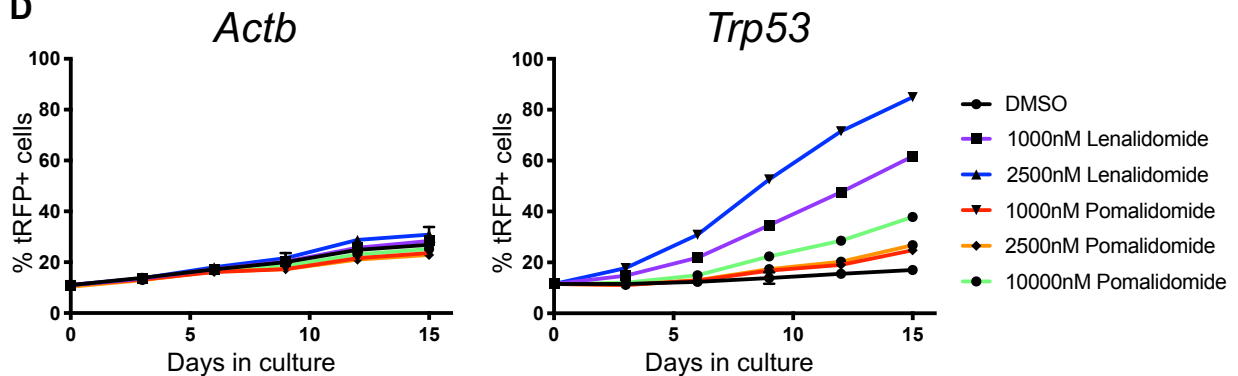

**Supplementary Figure S9. (A)** Schematic for generation of Hoxb8 lines. **(B)** Hoxb8 lines were generated from the CRBN<sup>I391V</sup> and wild type B16 mice and treated with serial dilutions of lenalidomide or pomalidomide for 72 hours and cell density measured using CellTiter-Glo. Data are normalized to the vehicle (DMSO) control and shown as the mean +/- standard deviation (SD) (n = 3 replicates). Curves represent the logistic regression. **(C)** Schematic for long term competition experiments with Hoxb8 lines. **(D)** Hoxb8 cells were transduced with a non-targeting control (NTG) or sgRNAs targeting Trp53 or a cutting control guide targeting intronic sequence within the  $\beta$ -actin gene (*Actb*). Cells were mixed at a 90:10 ratio (NTG:*Trp53* or *Actb*) and treated with vehicle (DMSO) or increasing concentrations of lenalidomide and pomalidomide. A small aliquot of cells was subjected to analysis with fluorescence assisted cell sorting at the indicated times. Shown is the mean +/- SD (n = 3 replicates).

**A**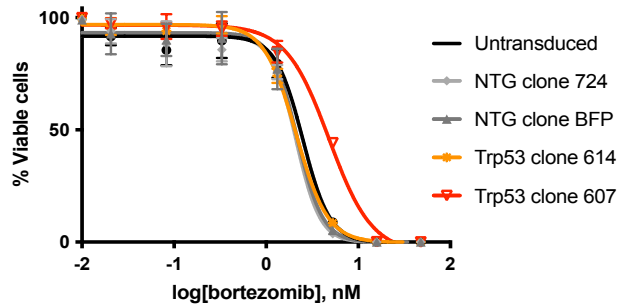**B**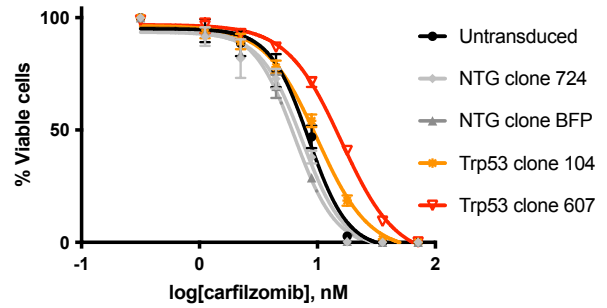

**Supplementary Figure S10.** Hoxb8 cells were transduced with a non-targeting control (NTG) or sgRNAs targeting Trp53 and were treated with serial dilutions of (A) bortezomib or (B) carfilzomib for 72 hours and cell density measured using CellTiter-Glo. Data are normalized to the vehicle (DMSO) control and shown as the mean  $\pm$  standard deviation (SD) ( $n = 3$  replicates). Curves represent the logistic regression.

**A**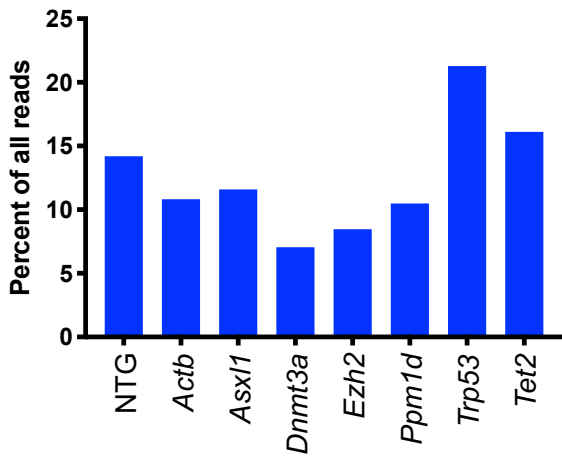**B**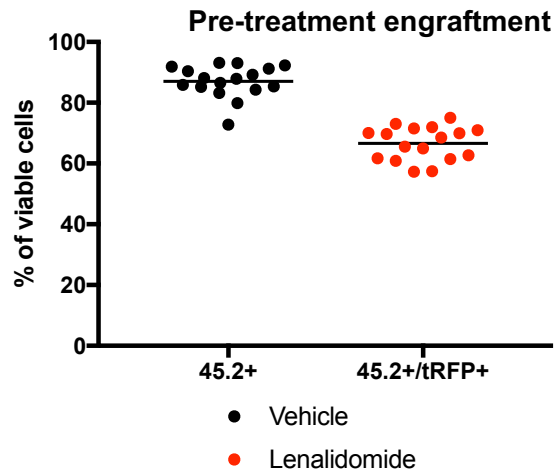**C**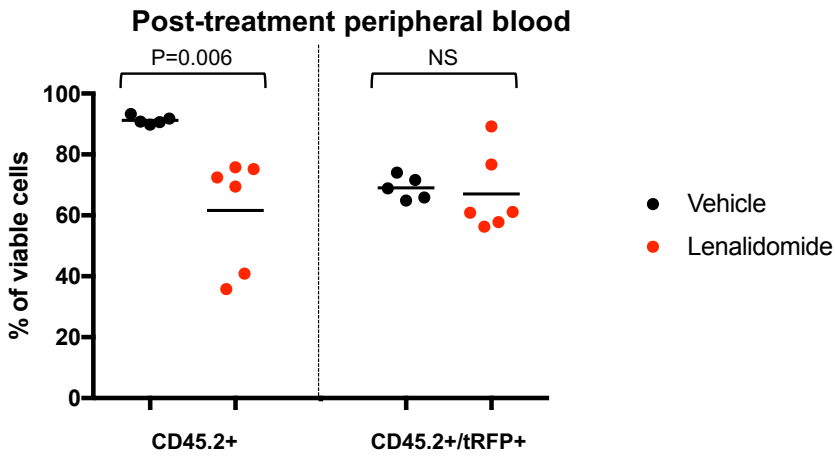**D**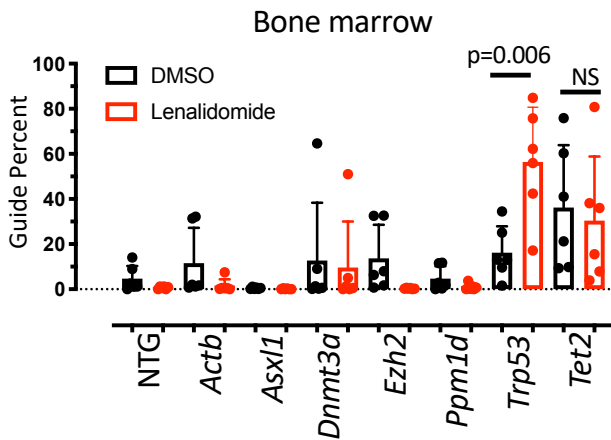

**Supplementary Figure S11.** Lineage<sup>lo</sup>, Sca1<sup>+</sup>, cKit<sup>+</sup> (LSK) cells were lentivirally transduced with individual guides, pooled at equal ratios and then transplanted into lethally irradiated Bl6.SJL recipient mice. **(A)** Remaining pooled cells were grown in culture for 48 hours at which time the guide frequency was determined using next generation sequencing. NTG1: non-targeting guide. *Actb*: cutting guide targeting intronic sequence within *β-actin* gene. **(B)** Following hematopoietic reconstitution 8 weeks post-transplant, mice were bled and the CD45.2 donor chimerism and transduction efficiency (CD45.2, tRFP+ percent) was determined. **(C)** Mice were treated with vehicle (DMSO) or lenalidomide 50mg/kg BID for 35 days and then bled and the CD45.2 donor chimerism and transduction efficiency (CD45.2, tRFP+ percent) was determined. Shown is the mean. P-values are from unpaired two-sided T-tests. **(D)** Whole bone marrow was harvested from mice following treatment with vehicle or lenalidomide and sgRNA sequence was amplified and quantitated using NGS. The frequency of each sgRNA sequence for each mouse is plotted. Shown is the mean +/- SD (n = 6 mice per group). P-values are from unpaired single-sided T-tests.



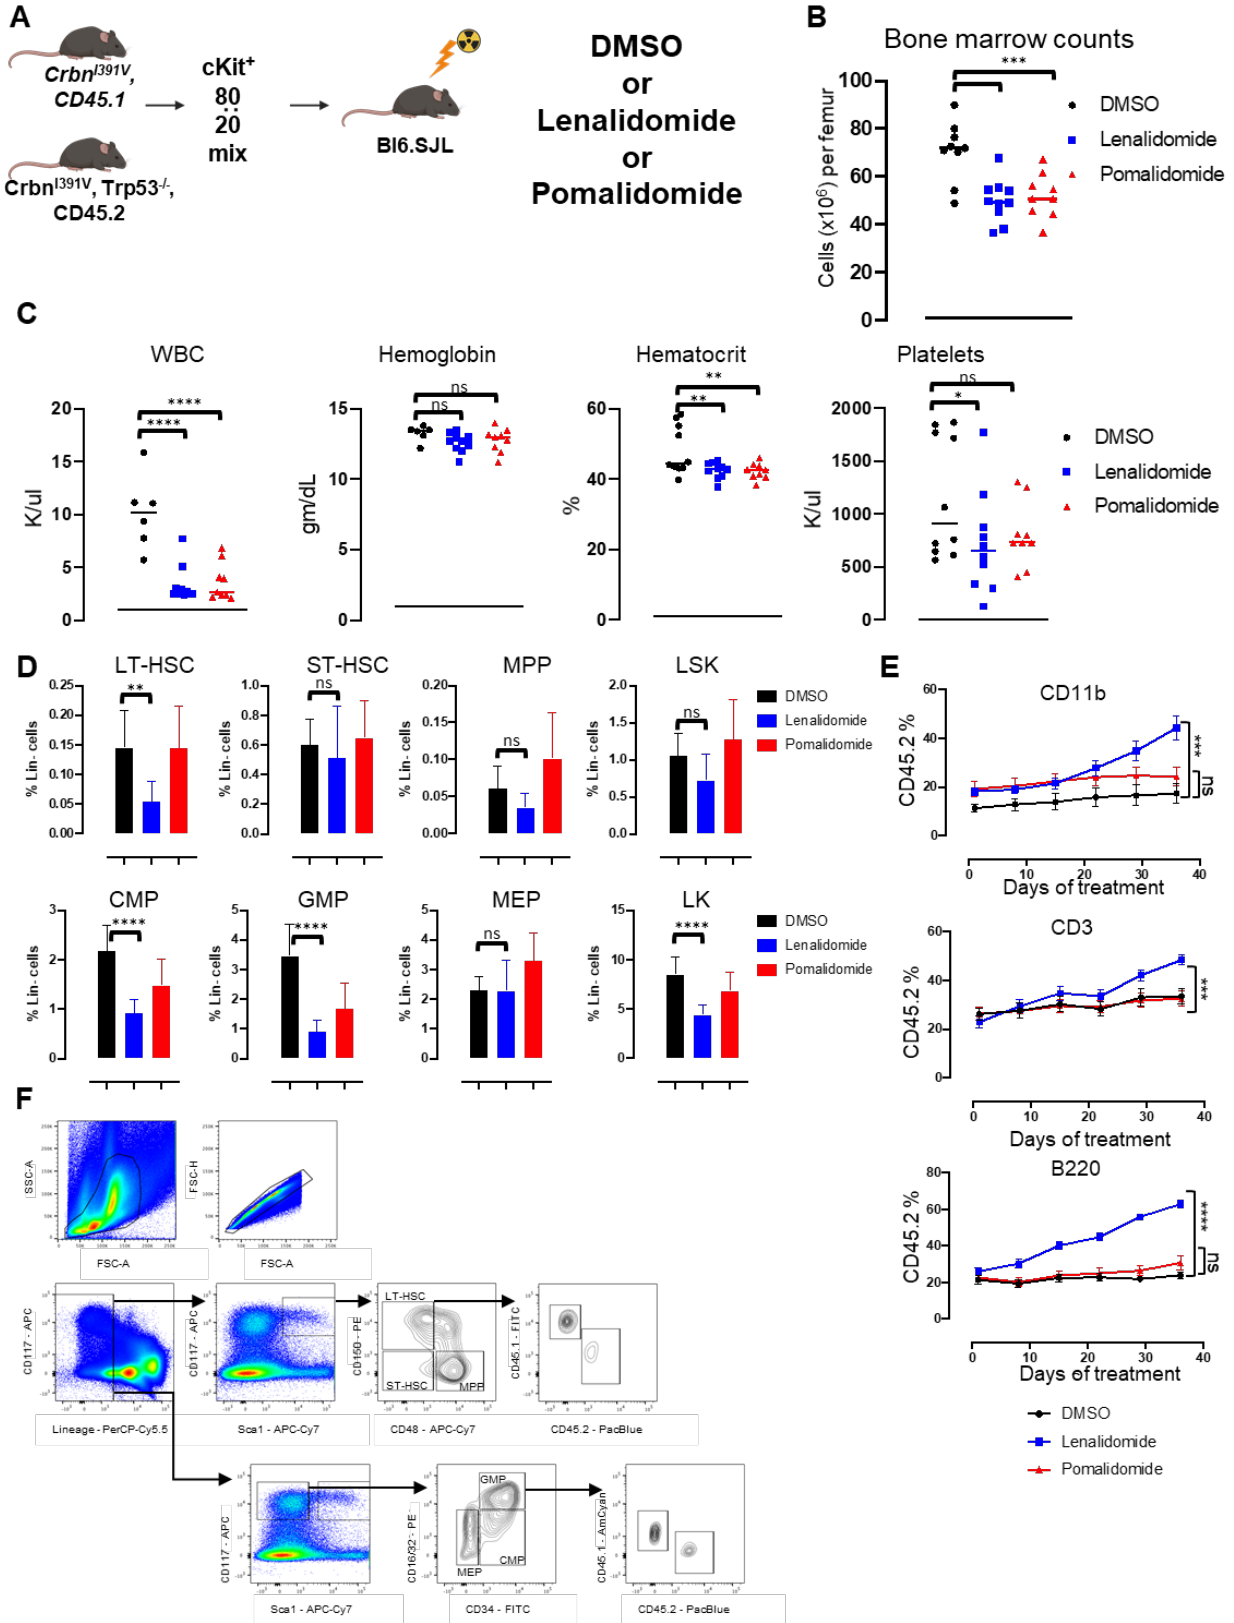

**Supplementary Figure S12. (A)** Schematic for the Trp53 competitive transplant experiment. Following hematopoietic reconstitution, chimeric transplants containing 20% *Trp53*<sup>-/-</sup>, *Crbn*<sup>I391V</sup> (mutant, CD45.2) and 80% *Crbn*<sup>I391V</sup> (WT, CD45.1) were treated with vehicle (DMSO), lenalidomide 50mg/kg BID, or pomalidomide 20mg/kg BID. **(B)** Bone marrow cellularity per femur following Trp53 competitive transplant and treatment. **(C)** Peripheral blood parameters were measured on the hemavet following completion of treatment course. **(D)** Total number of cells within each bone marrow compartment plotted as percent of Lineage<sup>lo</sup> viable cells. Lineage<sup>lo</sup>, Sca1<sup>+</sup>, cKit<sup>+</sup> (LSK), long term hematopoietic stem cells (LT-HSC: LSK, CD150<sup>+</sup>, CD48<sup>-</sup>), short term-HSC (ST-HSC: LSK, CD150<sup>-</sup>, CD48<sup>-</sup>), multipotent progenitor (MPP: LSK, CD150<sup>-</sup>, CD48<sup>+</sup>), common myeloid progenitor (CMP: LK, CD16/32<sup>-</sup>, CD34<sup>+</sup>), granulocyte-monocyte progenitor (GMP: LK, CD16/32<sup>+</sup>, CD34<sup>+</sup>), megakaryocyte-erythroid progenitor (MEP: LK, CD16/32<sup>-</sup>, CD34<sup>-</sup>). **(E)** Chimerism was measured within each of the three primary peripheral white blood cell lineages at the times noted. Shown is the mean +/- SEM. \* = p<0.05; \*\* = p<0.01, \*\*\* = p<0.001, \*\*\*\* = p<0.0001, ns = not significant. P-values are from one-way ANOVA. **(F)** Representative fluorescence assisted cell sorting gating schema for bone marrow HSC and progenitor analyses.

**A**

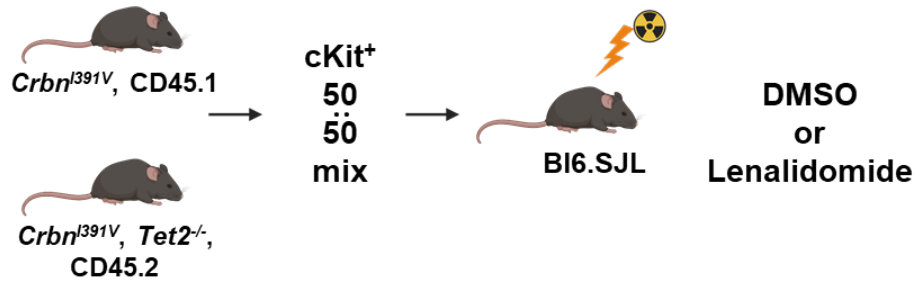

**B**

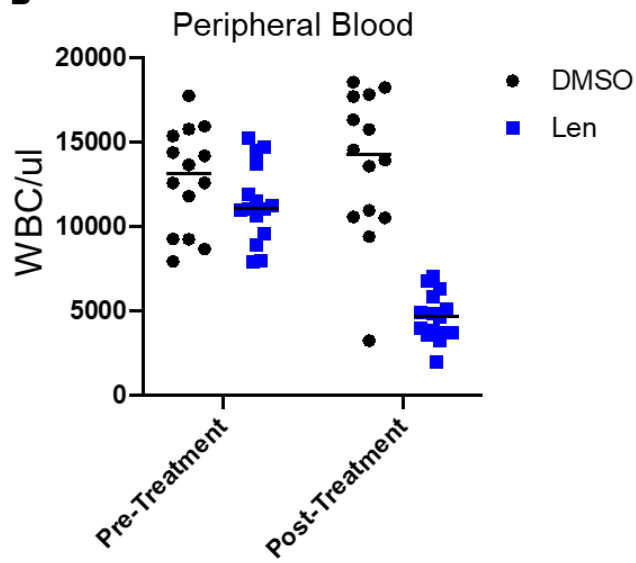

**C**

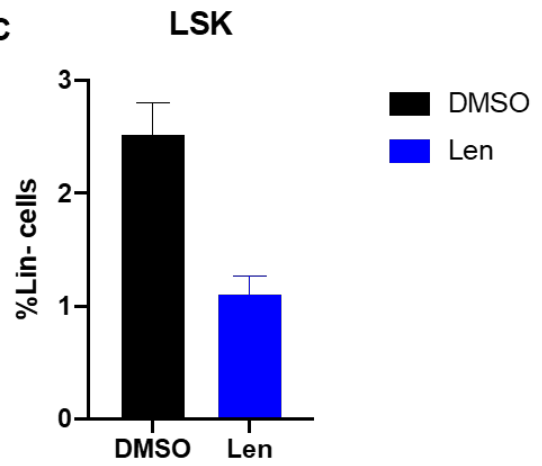

**D**

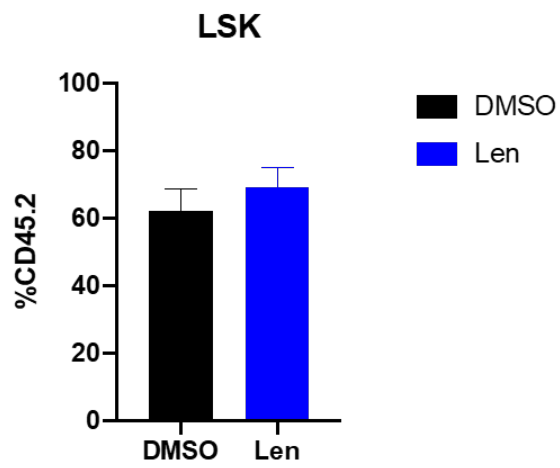

**Supplementary Figure S13.** (A) Schematic for the *Tet2* competitive transplant experiment. (B) Peripheral blood leukocyte counts measured using fluorescence assisted cell sorting before and after treatment with lenalidomide 50mg/kg BID. (C) Bone marrow Lineage<sup>lo</sup>, Sca1<sup>+</sup>, cKit<sup>+</sup> (LSK) cells as a percent of all viable Lineage<sup>lo</sup> cells. (D) *Tet2* mutant (CD45.2) chimerism within the LSK gate. Shown is the mean +/- SEM.



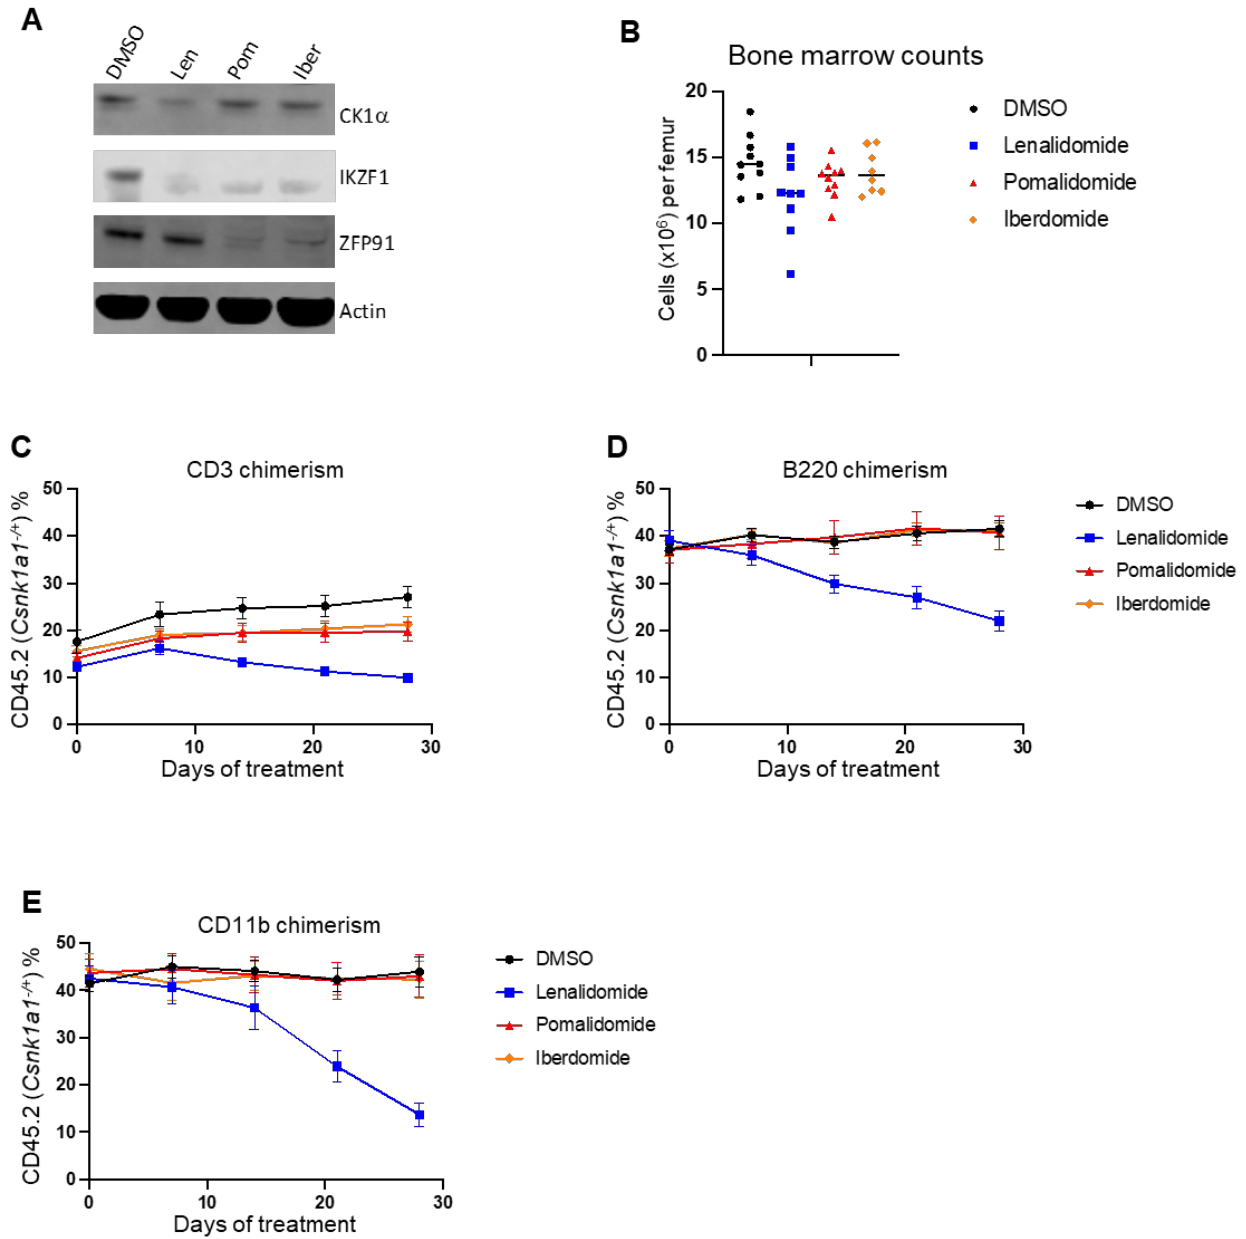

**Supplementary Figure S14. (A)** Western blot of KG-1 cells following overnight treatment with the indicated drug or vehicle at 10uM. DMSO = dimethyl sulfoxide; Len = lenalidomide; Pom = pomalidomide; Iber = iberdomide. Following *Csnk1a1* competitive transplant and treatment experiment. **(B)** Bone marrow cellularity per femur. Chimerism was measured within each of the three primary peripheral white blood cell lineages, CD3 T-cells **(C)**, B220 B-cells **(D)**, and CD11b myeloid cells **(E)** at the times noted. Shown is the mean +/- SEM.

**Supplementary Table S1. Clinical characteristics of 1,021 patients with MDS and AML without prior exposures.**

|                     | <b>Total</b>   | <b>AML (%)</b>  | <b>MDS (%)</b>   |
|---------------------|----------------|-----------------|------------------|
| N                   | 1021           | 611 (60)        | 410 (40)         |
| Median Age [Range]  | 67 [18-94]     | 64 [18-94]      | 70 [19-93]       |
| Male                | 622 (61)       | 323 (53)        | 299 (73)         |
| Hgb [Range]         | 9.2 [2.9-17.3] | 9.0 [2.9-15.2]  | 9.7 [5.2-17.3]   |
| WBC [Range]         | 4.3 [0-341.4]  | 5.5 [0.0-341.4] | 3.9 [0.5-185.1]  |
| ANC [Range]         | 2.4 [0-112.9]  | 3.0 [0-103.7]   | 2.27[0.01-112.9] |
| PLT [Range]         | 64 [0-1069]    | 49 [0-1069]     | 98 [5-695]       |
| <b>ELN Risk</b>     |                |                 |                  |
| Favorable           |                | 134 (22)        | NA               |
| Intermediate        |                | 198 (33)        | NA               |
| Adverse             |                | 274 (45)        | NA               |
| <b>IPSS-R Risk</b>  |                |                 |                  |
| Very Low            |                | NA              | 25 (6)           |
| Low                 |                | NA              | 111 (27)         |
| Intermediate        |                | NA              | 112 (27)         |
| High                |                | NA              | 74 (18)          |
| Very High           |                | NA              | 88 (22)          |
| <b>Cytogenetics</b> |                |                 |                  |
| Diploid             | 503 (49)       | 275 (45)        | 228 (56)         |
| Complex             | 192 (19)       | 113 (18)        | 79 (19)          |
| -5/del 5q           | 126 (12)       | 76 (12)         | 50 (12)          |
| -7/del7-            | 99 (10)        | 67 (11)         | 32 (8)           |
| Inv 16/t(16;16)     | 23 (2)         | 23 (4)          | 0 (0)            |
| 11q23               | 26 (3)         | 18 (3)          | 8 (2)            |
| t(15;17)            | 31 (3)         | 31 (5)          | 0 (0)            |
| t(8;21)             | 19 (2)         | 19 (3)          | 0 (0)            |
| -Y                  | 30 (3)         | 18 (3)          | 12 (3)           |
| del(11)             | 14 (3)         | 6 (4)           | 8 (3)            |
| del(20q)            | 57 (6)         | 20 (3)          | 37 (9)           |

|              |        |        |         |
|--------------|--------|--------|---------|
| del(12)      | 37 (4) | 22 (4) | 15 (4)  |
| Trisomy 8    | 97 (9) | 53 (9) | 44 (11) |
| Inv3q/t(3;3) | 8 (1)  | 6 (1)  | 2 (0.5) |



**Supplementary Table 2.** Genes targeted by 81 gene panel and 300 gene panel. Genes covered by both panels are highlighted in red.

**81 gene Agilent SureSelect XTHS panel**

|                |               |              |               |               |                |               |               |              |
|----------------|---------------|--------------|---------------|---------------|----------------|---------------|---------------|--------------|
| <i>ANKRD26</i> | <i>CBLB</i>   | <i>EED</i>   | <i>GFI1</i>   | <i>JAK1</i>   | <i>NF1</i>     | <i>PTEN</i>   | <i>SH2B3</i>  | <i>SUZ12</i> |
| <i>ASXL1</i>   | <i>CBLC</i>   | <i>ELANE</i> | <i>GNAS</i>   | <i>JAK2</i>   | <i>NOTCH1</i>  | <i>PTPN11</i> | <i>SMC1A</i>  | <i>TERC</i>  |
| <i>ASXL2</i>   | <i>CEBPA</i>  | <i>ETNK1</i> | <i>HNRNPK</i> | <i>JAK3</i>   | <i>NPM1</i>    | <i>RAD21</i>  | <i>SMC3</i>   | <i>TERT</i>  |
| <i>BCOR</i>    | <i>CREBBP</i> | <i>ETV6</i>  | <i>HRAS</i>   | <i>KDM6A</i>  | <i>NRAS</i>    | <i>RARA</i>   | <i>SRSF2</i>  | <i>TET2</i>  |
| <i>BCORL1</i>  | <i>CRLF2</i>  | <i>EZH2</i>  | <i>IDH1</i>   | <i>KIT</i>    | <i>PAX5</i>    | <i>RUNX1</i>  | <i>STAG1</i>  | <i>TP53</i>  |
| <i>BRAF</i>    | <i>CSF3R</i>  | <i>FBXW7</i> | <i>IDH2</i>   | <i>KTM2A</i>  | <i>PHF6</i>    | <i>SETBP1</i> | <i>STAG2</i>  | <i>U2AF1</i> |
| <i>BRINP3</i>  | <i>CUX1</i>   | <i>FLT3</i>  | <i>IKZF1</i>  | <i>KRAS</i>   | <i>PIGA</i>    | <i>SF1</i>    | <i>STAT3</i>  | <i>U2AF2</i> |
| <i>CALR</i>    | <i>DDX41</i>  | <i>GATA1</i> | <i>IL2RG</i>  | <i>MAP2K1</i> | <i>PML</i>     | <i>SF3A1</i>  | <i>STAT5A</i> | <i>WT1</i>   |
| <i>CBL</i>     | <i>DNMT3A</i> | <i>GATA2</i> | <i>IL7R</i>   | <i>MPL</i>    | <i>PRPF40B</i> | <i>SF3B1</i>  | <i>STAT5B</i> | <i>ZRSR2</i> |

### 300 gene Agilent SureSelect XT panel

|         |           |         |          |           |         |          |         |              |          |
|---------|-----------|---------|----------|-----------|---------|----------|---------|--------------|----------|
| ABCC9   | BTK       | CTLA4   | FANCA    | HIST1H2AD | LAMB4   | NBN      | PLCG2   | SF3B1        | TLR2     |
| ABL1    | BTLA      | CTNNA1  | FANCB    | HIST1H2BE | LEF1    | NCOR1    | POT1    | SFRS1        | TLR9     |
| ACD     | C22orf194 | CUL5    | FANCC    | HIST1H2BF | LRP1B   | NCOR2    | PPM1D   | SFRS7        | TNFAIP3  |
| ACTG1   | CALR      | CUX1    | FANCD2   | HIST1H3D  | LTB     | NF1      | POU2AF1 | SGK1         | TNFRSF14 |
| AKT1    | CARD11    | CYLD    | FANCE    | HIST1H4D  | LUC7L2  | NFE2     | PRDM1   | SH2B3        | TNKS     |
| ANKRD11 | CBL       | DAXX    | FANCG    | HNRNPK    | LYN     | NFKB1    | PRKCB   | SHH          | TOX      |
| ANKRD26 | CBLB      | DCLRE1C | FANCI    | HRAS      | MALT1   | NFKB2    | PTEN    | SMAD2        | TP53     |
| ARID1A  | CCND1     | DDX3X   | FANCL    | ICOS      | MAP2K1  | NFKBIA   | PTPN1   | SMC1A        | TRAF3    |
| ARID1B  | CCND3     | DDX41   | FAS      | ID3       | MAPK1   | NFKBIE   | PTPN11  | SMC3         | TRAF6    |
| ARID2   | CD200     | DIS3    | FAT1     | IDH1      | MAX     | NOTCH1   | RAD21   | SMC5         | TYK2     |
| ARID5B  | CD274     | DKC1    | FAT3     | IDH2      | MDM2    | NOTCH2   | RAD51C  | SNX7         | TYK3     |
| ARPP21  | CD58      | DLC1    | FBXW7    | IKBKA     | MED12   | NPM1     | RAG1    | SOCS1        | U2AF1    |
| ASXL1   | CD79A     | DNM2    | FGFR3    | IKZF1     | MEF2B   | NR3C2    | RAG2    | SOX5         | U2AF2    |
| ATF7IP  | CD79B     | DNMT1   | FLI1     | IKZF2     | MEF2C   | NRAS     | RASA2   | SP140        | UBR5     |
| ATM     | CDK4      | DNMT3A  | FLT3     | IKZF3     | MGA     | NSD2     | RB1     | SPEN         | USP29    |
| ATRX    | CDKN2A    | DNMT3B  | FNDC3A   | IL7R      | mir125a | NT5C2    | REL     | SPIB         | VPREB1   |
| B2M     | CDKN2B    | EBF1    | FOXP1    | IRAK1     | mir-142 | PAG1     | RELA    | SRSF2        | WHSC1    |
| BCL10   | CDKN2C    | ECT2L   | FYN      | IRAK4     | mir155  | PALB2    | RELB    | STAG1        | WHSC1L1  |
| BCL2    | CEBPA     | EED     | G6PC3    | IRF1      | mir15a  | PAX5     | RELN    | STAG2        | WT1      |
| BCL6    | CEBPE     | EGR1    | GAB2     | IRF4      | mir16-1 | PDCD1    | RHOA    | STAT1        | XPO1     |
| BCL7A   | CHD2      | EGR2    | GATA1    | IRF7      | MIR17HG | PDCD1LG2 | RIPK1   | STAT3        | ZAP70    |
| BCOR    | CHK2      | ELANE   | GATA2    | ITPKB     | mir21   | PDGFRB   | ROBO1   | SUZ12        | ZMYM2    |
| BCR     | CIITA     | EP300   | GATA3    | JAK1      | mir34b  | PEG3     | ROR1    | SYK          | ZMYM3    |
| BIRC3   | CNOT3     | EPHA7   | GCET2    | JAK2      | mir34c  | PHF6     | RPL10   | TBL1XR1      | ZRSR2    |
| BLK     | CREBBP    | EPOR    | GFI1B    | JAK3      | MLL     | PHIP     | RPL5    | TCF3         |          |
| BMI1    | CRLF2     | ERG     | GNA13    | JARID2    | MLL2    | PIGA     | RTEL1   | TERC         |          |
| BRAF    | CSF2RA    | ETNK1   | GNAS     | KDM4C     | MLL3    | PIK3CA   | RUNX1   | TERT         |          |
| BRCA1   | CSF3R     | ETV6    | GNB1     | KDM6A     | MPL     | PIK3CB   | RUNX2   | TET1         |          |
| BRCA2   | CTBP1     | EZH2    | GPRC5A   | KIT       | MS4A1   | PIK3CG   | SAMHD1  | TET2         |          |
| BRIP1   | CTBP2     | FAM46C  | HAX1     | KLHL6     | MYB     | PIK3R1   | SETBP1  | TGDS         |          |
| BTG1    | CTCF      | FAM5C   | HIST1H1E | KRAS      | MYD88   | PLA2G2D  | SETD2   | TINF2 (TIN2) |          |

**Supplementary Table S3.** Sequences of 8 sgRNA

| <b>Guide</b>            | <b>Sequence</b>       |
|-------------------------|-----------------------|
| <b>NTG</b>              | GACGGAGGCTAAGCGTCGCAA |
| <b><i>Actb.g0</i></b>   | AGGTTGCTCTGACAACCACA  |
| <b><i>Asx1.g3</i></b>   | GGCAGTGGGGCCATCGATGA  |
| <b><i>Tet2.g1</i></b>   | AATACTATCCTAGTTCCGAC  |
| <b><i>Dnmt3a.g1</i></b> | AATGAAGAGTGGGTGCTCCA  |
| <b><i>Ezh2.g2</i></b>   | AGAGTACATTATAGGCACCG  |
| <b><i>Ppm1d.g1</i></b>  | TGGCTTAAGTCGAAGTAGCG  |
| <b><i>Trp53.g3</i></b>  | GAAGTCACAGCACATGACGG  |

**Supplementary Table S4** Multivariable logistic regression analysis for each gene mutation against prior exposures.

| Gene         | Exposures           | Odds Ratio  | Lower 95% CI | Higher 95% CI | P value     |
|--------------|---------------------|-------------|--------------|---------------|-------------|
| <i>TP53</i>  | Thalidomide analogs | 3.136274807 | 1.592845192  | 6.175251503   | 0.00094415  |
|              | Platinum            | 1.590410732 | 0.9401736    | 2.690360904   | 0.083638249 |
|              | Taxanes             | 1.643444244 | 0.929247368  | 2.906555429   | 0.0876882   |
|              | Topoisomerase Inh   | 0.486786683 | 0.261689608  | 0.905505103   | 0.02300099  |
|              | Vinca Alkaloid      | 1.755328275 | 1.053295525  | 2.925273373   | 0.030832734 |
| <i>PPM1D</i> | Platinum            | 3           | 1.317265665  | 6.832334768   | 0.008892515 |
| <i>TET2</i>  | Alkylating          | 0.394583502 | 0.226466221  | 0.687502707   | 0.001028518 |
|              | Platinum            | 0.555409168 | 0.292838422  | 1.053411441   | 0.071760577 |
| <i>IDH2</i>  | Alkylating          | 0.247792978 | 0.050937838  | 0.979726915   | 0.046512203 |
|              | Antimetabolites     | 2.433825817 | 0.774212665  | 7.321009215   | 0.123980192 |
|              | Anthracyclines      | 3.51233392  | 0.899425615  | 12.56429188   | 0.069634342 |
|              | Vinca Alkaloid      | 0.066630236 | 0.000494715  | 0.669835086   | 0.01801596  |
| <i>ASXL1</i> | Antimetabolites     | 0.572308332 | 0.288064676  | 1.137025307   | 0.111085555 |
|              | Thalidomide analogs | 0.322763494 | 0.075187762  | 1.385548261   | 0.128190241 |
| <i>EZH2</i>  | Vinca Alkaloid      | 3.44281042  | 1.130913755  | 10.48085545   | 0.029513529 |
| <i>BCOR</i>  | Platinum            | 0.237500001 | 0.030071329  | 1.875748505   | 0.172752852 |
| <i>RUNX1</i> | Thalidomide analogs | 0.325791858 | 0.076324914  | 1.390638119   | 0.129871014 |
| <i>STAG2</i> | Anthracyclines      | 0.282103493 | 0.060834577  | 1.308176772   | 0.105929973 |
|              | Platinum            | 0.230159889 | 0.029280198  | 1.809194563   | 0.162599224 |
| <i>SRSF2</i> | SCT                 | 0.187538713 | 0.024370528  | 1.44316812    | 0.107918192 |
|              | Taxanes             | 0.446255852 | 0.167582049  | 1.188339005   | 0.106385935 |
|              | Topoisomerase Inh   | 0.129573295 | 0.017102406  | 0.981688685   | 0.047945491 |
|              | XRT                 | 1.687274821 | 0.836887055  | 3.401768862   | 0.143678864 |
| <i>U2AF1</i> | SCT                 | 0.262753608 | 0.034026165  | 2.02901084    | 0.200006082 |
|              | Taxanes             | 0.241453277 | 0.031301843  | 1.862500071   | 0.172781245 |
| <i>SF3B1</i> | Platinum            | 0.260079176 | 0.051762135  | 1.306769468   | 0.102023847 |
|              | SCT                 | 0.237299775 | 0.02804762   | 2.007699158   | 0.186754025 |
|              | Topoisomerase Inh   | 3.604242472 | 0.970209284  | 13.38944495   | 0.055518494 |
| Splicing     | Platinum            | 0.593825312 | 0.308196604  | 1.144167379   | 0.119354547 |
|              | SCT                 | 0.283984432 | 0.108035316  | 0.746488842   | 0.010683206 |
|              | Taxanes             | 0.405792998 | 0.184962465  | 0.890277695   | 0.024456043 |
|              | Vinca Alkaloid      | 0.535545449 | 0.279540786  | 1.026000293   | 0.05975693  |
| <i>NPM1</i>  | Alkylating          | 0.035203766 | 0.000273475  | 0.272812489   | 0.000124387 |
|              | Platinum            | 3.048932395 | 0.896642627  | 9.794107071   | 0.072644886 |
|              | Taxanes             | 0.087721491 | 0.000660126  | 0.805530678   | 0.027916799 |
| <i>NRAS</i>  | Topoisomerase Inh   | 0.197555329 | 0.044106567  | 0.884859338   | 0.034017515 |
|              | Vinca Alkaloid      | 2.063986213 | 0.903640464  | 4.714307577   | 0.085518193 |
| <i>KRAS</i>  | Platinum            | 2.096671139 | 0.778365082  | 5.647773733   | 0.143092471 |

|                  |                     |             |             |             |             |
|------------------|---------------------|-------------|-------------|-------------|-------------|
|                  | Taxanes             | 0.159367553 | 0.020152777 | 1.260273817 | 0.081735065 |
|                  | XRT                 | 3.52742523  | 1.140775885 | 10.90725087 | 0.028622948 |
| <i>NRAS.KRAS</i> | Alkylating          | 0.481097878 | 0.198674493 | 1.164996898 | 0.104906588 |
|                  | Thalidomide analogs | 2.636324228 | 0.800649698 | 8.680706994 | 0.110867753 |
|                  | SCT                 | 0.397161609 | 0.123976206 | 1.272319488 | 0.120060685 |
|                  | Vinca Alkaloid      | 2.788701636 | 1.079049692 | 7.207135009 | 0.034258906 |
|                  | XRT                 | 1.636067252 | 0.834651588 | 3.206986115 | 0.151679493 |
| <i>FLT3</i>      | Antimetabolites     | 2.048207187 | 0.843384605 | 4.974186933 | 0.113258678 |
|                  | SCT                 | 0.204737039 | 0.026881037 | 1.559361524 | 0.125749673 |
| <i>PTPN11</i>    | Antimetabolites     | 0.319393149 | 0.066092409 | 1.543475034 | 0.155617519 |
|                  | Thalidomide analogs | 6.347848578 | 0.789838322 | 51.01699985 | 0.0821961   |
|                  | SCT                 | 0.077643363 | 0.004996584 | 1.206522706 | 0.06787527  |
|                  | XRT                 | 0.183435235 | 0.046663411 | 0.72108928  | 0.015176287 |
| <i>NF1</i>       | Alkylating          | 0.400199172 | 0.135524794 | 1.181771787 | 0.097387221 |
|                  | Taxanes             | 2.857425843 | 0.997888304 | 8.182160685 | 0.050462128 |
| <i>SETBP1</i>    | Alkylating          | 0.239615278 | 0.037213586 | 1.542863425 | 0.132685019 |
|                  | Anthracyclines      | 5.623735582 | 0.875021098 | 36.14358782 | 0.068862693 |
|                  | Platinum            | 0.174618891 | 0.020951809 | 1.455328119 | 0.106718303 |
|                  | XRT                 | 4.096452134 | 0.847901652 | 19.79111616 | 0.079317366 |
| Diploid          | Alkylating          | 0.523395484 | 0.305370849 | 0.897082459 | 0.01852111  |
|                  | Platinum            | 0.439956    | 0.235021873 | 0.823588373 | 0.01026821  |
|                  | SCT                 | 0.328447629 | 0.121743419 | 0.886108226 | 0.027895317 |
|                  | XRT                 | 0.68475348  | 0.409184418 | 1.145907095 | 0.149436285 |
| 11q23            | Alkylating          | 3.561349505 | 1.103275562 | 11.49595871 | 0.033641212 |
|                  | Antimetabolites     | 0.468847712 | 0.182078331 | 1.207272579 | 0.116499312 |
|                  | Anthracyclines      | 2.519421704 | 0.820464187 | 7.736456784 | 0.106470506 |
|                  | SCT                 | 0.085986417 | 0.010232517 | 0.722565544 | 0.023873129 |
|                  | Topoisomerase Inh   | 3.176083864 | 1.154003178 | 8.741317965 | 0.025269262 |
|                  | Vinca Alkaloid      | 0.223614215 | 0.070470818 | 0.709560621 | 0.011011338 |
| Del 5q/-5        | Antibiotic          | 1.940353545 | 0.800973144 | 4.700497026 | 0.142006573 |
|                  | Anthracyclines      | 1.457598342 | 0.934968831 | 2.272367653 | 0.096281107 |
|                  | Thalidomide analogs | 1.95294113  | 0.993890319 | 3.837424498 | 0.052115139 |
|                  | Platinum            | 1.664277156 | 1.002337628 | 2.763358745 | 0.048954324 |
|                  | Topoisomerase Inh   | 0.431658238 | 0.226062423 | 0.82423621  | 0.010906377 |
| Del 7q/-7        | Antibiotic          | 2.068503677 | 0.847173656 | 5.05056718  | 0.110528223 |
|                  | Thalidomide analogs | 2.850109171 | 1.453545192 | 5.588489669 | 0.002299077 |
|                  | Platinum            | 1.946944977 | 1.170879367 | 3.237391359 | 0.010228482 |
|                  | Topoisomerase Inh   | 0.62551881  | 0.333440261 | 1.173444921 | 0.143831022 |
|                  | Vinca Alkaloid      | 2.171020328 | 1.296114636 | 3.636506472 | 0.003224481 |
| Del 17p/-17      | Thalidomide analogs | 3.715819023 | 1.274888858 | 10.83020761 | 0.016175692 |
|                  | Platinum            | 2.811829805 | 1.541025313 | 5.130601546 | 0.000753478 |

|              |                     |             |             |             |             |
|--------------|---------------------|-------------|-------------|-------------|-------------|
|              | SCT                 | 0.356194867 | 0.129311137 | 0.981158985 | 0.045851667 |
| Del 20q      | Antibiotic          | 3.896935474 | 1.440681634 | 10.54091739 | 0.007381563 |
|              | Topoisomerase Inh   | 1.803520862 | 0.844682351 | 3.850781888 | 0.127553928 |
| -Y           | Antibiotic          | 4.842999147 | 0.913607836 | 25.67254768 | 0.063769553 |
|              | Anthracyclines      | 0.146183327 | 0.030582715 | 0.698746501 | 0.015993523 |
| Inv3q.t.3.x. | Antimetabolites     | 0.348113528 | 0.11852286  | 1.022444349 | 0.054910162 |
|              | Anthracyclines      | 2.800168516 | 1.07606755  | 7.286664965 | 0.034840175 |
|              | Platinum            | 2.656524855 | 1.041647126 | 6.774966427 | 0.040816876 |
|              | SCT                 | 2.245452424 | 0.846161686 | 5.958738943 | 0.104270262 |
| Trisomy 8    | Thalidomide analogs | 0.289141625 | 0.077612067 | 1.077189192 | 0.064435208 |
|              | SCT                 | 2.911924763 | 1.073164947 | 7.901213927 | 0.035851243 |
|              | Topoisomerase Inh   | 0.395030424 | 0.152654369 | 1.022237602 | 0.055540299 |
| Trisomy 21   | Anthracyclines      | 0.232854654 | 0.072376999 | 0.749150849 | 0.014509647 |
|              | Taxanes             | 2.309277917 | 0.991085266 | 5.380732295 | 0.0524751   |
|              | Vinca Alkaloid      | 4.071166991 | 1.12108283  | 14.7842784  | 0.032870004 |
| Complex      | Platinum            | 1.880747126 | 1.225698868 | 2.885871763 | 0.003833219 |

**Supplementary Table S5.** The list of high-confidence somatic mutations detected in t-MN patients by the 300 gene panel sequencing.

| Sample ID  | Gene         | AA change or nucleotide change                                                                                                   | VAF      |
|------------|--------------|----------------------------------------------------------------------------------------------------------------------------------|----------|
| 1004981-7  | <i>IDH1</i>  | IDH1:uc002vcu.3:exon4:c.G395A:p.R132H                                                                                            | 0.458484 |
| 1004981-7  | <i>TET2</i>  | TET2:uc011cez.2:exon11:c.A5774G:p.H1925R                                                                                         | 0.493078 |
| 1005468-11 | <i>IDH1</i>  | IDH1:uc002vcu.3:exon4:c.G395A:p.R132H                                                                                            | 0.493317 |
| 1005468-11 | <i>NPM1</i>  | NPM1:uc003mbi.3:exon11:c.859_860insTCTG:p.L287fs                                                                                 | 0.2816   |
| 1005468-11 | <i>TET2</i>  | TET2:uc011cez.2:exon11:c.A5774G:p.H1925R                                                                                         | 0.471475 |
| 1005468-11 | <i>TET2</i>  | TET2:uc011cez.2:exon11:c.5344_5345del:p.H1782fs                                                                                  | 0.3533   |
| 1005468-4  | <i>IDH1</i>  | IDH1:uc002vcu.3:exon4:c.G395A:p.R132H                                                                                            | 0.448957 |
| 1005468-4  | <i>TET2</i>  | TET2:uc011cez.2:exon11:c.A5774G:p.H1925R                                                                                         | 0.467811 |
| 1013908-4  | <i>NF1</i>   | NF1:uc002hgg.3:exon42:c.G6208T:p.E2070X                                                                                          | 0.598361 |
| 1013908-4  | <i>TET2</i>  | TET2:uc011cez.2:exon10:c.G4345T:p.E1449X                                                                                         | 0.135093 |
| 1019548-3  | <i>NRAS</i>  | NRAS:uc009wgu.3:exon3:c.A183T:p.Q61H                                                                                             | 0.154273 |
| 1019548-3  | <i>NRAS</i>  | NRAS:uc009wgu.3:exon2:c.G35T:p.G12V                                                                                              | 0.076433 |
| 1019548-3  | <i>SRSF2</i> | SRSF2:uc010wtg.2:exon1:c.C284A:p.P95H                                                                                            | 0.519187 |
| 1032799-1  | <i>TP53</i>  | TP53:uc002gii.2:exon4:c.G334T:p.E112X                                                                                            | 0.416537 |
| 1032799-1  | <i>TP53</i>  | TP53:uc002gio.3:exon2:c.81_82insCGCGCC:p.M28delinsRAM                                                                            | 0.3005   |
| 1039307-1  | <i>ASXL1</i> | ASXL1:uc021wbw.1:exon13:c.2270delA:p.Q757fs                                                                                      | 0.3114   |
| 1039307-1  | <i>NRAS</i>  | NRAS:uc009wgu.3:exon2:c.G35C:p.G12A                                                                                              | 0.097297 |
| 1039307-1  | <i>RUNX1</i> | RUNX1:uc010gmw.1:exon6:c.583_584insAA:p.I195fs                                                                                   | 0.2483   |
| 1039307-1  | <i>SRSF2</i> | SRSF2:uc010wtg.2:exon1:c.C284A:p.P95H                                                                                            | 0.314031 |
| 1039307-1  | <i>STAG2</i> | STAG2:uc004eud.3:exon15:c.1394dupT:p.V465fs                                                                                      | 0.2201   |
| 1039307-1  | <i>STAG2</i> | STAG2:uc004eud.3:exon5:c.220delC:p.H74fs                                                                                         | 0.1111   |
| 152539-1   | <i>ASXL1</i> | ASXL1:uc021wbw.1:exon13:c.G4232A:p.W1411X                                                                                        | 0.089077 |
| 323458-5   | <i>KRAS</i>  | KRAS:uc001rgq.1:exon3:c.C173T:p.T58I                                                                                             | 0.060109 |
| 334470-13  | <i>NRAS</i>  | NRAS:uc009wgu.3:exon2:c.G35A:p.G12D                                                                                              | 0.135106 |
| 334470-8   | <i>NRAS</i>  | NRAS:uc009wgu.3:exon2:c.G35A:p.G12D                                                                                              | 0.153017 |
| 336040-3   | <i>PPM1D</i> | p.N574fs                                                                                                                         | 0.0354   |
| 336040-3   | <i>TP53</i>  | TP53:uc002gii.2:exon1:c.C46G:p.R16G                                                                                              | 0.530103 |
| 338884-11  | <i>RUNX1</i> | chr21:36252852:A-G, splicing                                                                                                     | 0.995862 |
| 338884-11  | <i>SRSF2</i> | SRSF2:uc010wtg.2:exon1:c.284_307del:p.95_103del                                                                                  | 0.3955   |
| 338884-11  | <i>TET2</i>  | TET2:uc011cez.2:exon6:c.3779_3780insTCTGGCTGACAACTCTACTCGGAGCTTACCGAGACGCTGAGGAAATACGGCACGCTCACCAA<br>TCGCCGGTGTGCCTTG:p.S1260fs | 0.3034   |
| 338884-8   | <i>RUNX1</i> | chr21:36252852:A-G, splicing                                                                                                     | 0.742515 |
| 349858-4   | <i>IDH2</i>  | IDH2:uc002box.3:exon4:c.G419A:p.R140Q                                                                                            | 0.263889 |
| 349858-4   | <i>NPM1</i>  | NPM1:uc003mbi.3:exon11:c.861_862insTGCA:p.L287fs                                                                                 | 0.1635   |
| 349858-4   | <i>SF3B1</i> | SF3B1:uc002uue.3:exon14:c.G1998T:p.K666N                                                                                         | 0.295238 |
| 352429-1   | <i>ASXL1</i> | ASXL1:uc021wbw.1:exon13:c.1927dupG:p.G642fs                                                                                      | 0.0573   |
| 352429-1   | <i>TET2</i>  | TET2:uc011cez.2:exon3:c.1505_1506del:p.Q502fs                                                                                    | 0.0544   |
| 352429-1   | <i>TP53</i>  | TP53:uc002gio.3:exon2:c.C9G:p.C3W                                                                                                | 0.118393 |

|          |               |                                                 |          |
|----------|---------------|-------------------------------------------------|----------|
| 504987-3 | <i>ETV6</i>   | ETV6:uc001qzz.3:exon5:c.T536A:p.L179X           | 0.184422 |
| 529042-1 | <i>DNMT3A</i> | chr2:25470459:C-T, splicing                     | 0.313869 |
| 529042-1 | <i>TP53</i>   | TP53:uc002gig.1:exon3:c.A358G:p.K120E           | 0.332046 |
| 529042-1 | <i>TP53</i>   | TP53:uc002gii.2:exon7:c.662delA:p.H221fs        | 0.3008   |
| 641158-2 | <i>TET2</i>   | TET2:uc011cez.2:exon3:c.2310_2316del:p.Q770fs   | 0.0776   |
| 641158-4 | <i>TET2</i>   | TET2:uc011cez.2:exon3:c.2310_2316del:p.Q770fs   | 0.0853   |
| 658064-4 | <i>IDH1</i>   | IDH1:uc002vcu.3:exon4:c.G395A:p.R132H           | 0.315718 |
| 658064-4 | <i>SRSF2</i>  | SRSF2:uc010wtg.2:exon1:c.C284T:p.P95L           | 0.368039 |
| 670527-1 | <i>TP53</i>   | TP53:uc002gii.2:exon2:c.C100G:p.H34D            | 0.226218 |
| 670527-1 | <i>TP53</i>   | TP53:uc002gio.3:exon2:c.C56A:p.P19H             | 0.205128 |
| 670527-1 | <i>TP53</i>   | TP53:uc002gig.1:exon3:c.97delT:p.S33fs          | 0.0703   |
| 672259-5 | <i>ASXL1</i>  | ASXL1:uc021wbw.1:exon13:c.1927dupG:p.G642fs     | 0.1441   |
| 672259-5 | <i>KRAS</i>   | KRAS:uc001rgq.1:exon2:c.G35A:p.G12D             | 0.222467 |
| 755527-1 | <i>TET2</i>   | TET2:uc011cez.2:exon3:c.2310_2316del:p.Q770fs   | 0.0984   |
| 755527-2 | <i>DNMT3A</i> | DNMT3A:uc002rgd.4:exon10:c.1238dupG:p.G413fs    | 0.0622   |
| 755527-2 | <i>TET2</i>   | TET2:uc011cez.2:exon3:c.2310_2316del:p.Q770fs   | 0.0965   |
| 770771-1 | <i>DNMT3A</i> | DNMT3A:uc002rgd.4:exon10:c.1238dupG:p.G413fs    | 0.2538   |
| 775168-6 | <i>DNMT3A</i> | DNMT3A:uc002rgd.4:exon23:c.C2644T:p.R882C       | 0.47654  |
| 775168-6 | <i>SRSF2</i>  | SRSF2:uc010wtg.2:exon1:c.C284A:p.P95H           | 0.409326 |
| 775168-6 | <i>TET2</i>   | TET2:uc011cez.2:exon3:c.C1834T:p.Q612X          | 0.481915 |
| 775168-6 | <i>TET2</i>   | TET2:uc011cez.2:exon11:c.5682_5685del:p.I1894fs | 0.3808   |
| 839168-5 | <i>SRSF2</i>  | SRSF2:uc010wtg.2:exon1:c.C284G:p.P95R           | 0.303398 |
| 839168-5 | <i>STAG2</i>  | STAG2:uc004eud.3:exon27:c.2763_2764del:p.L921fs | 0.3096   |
| 848193-3 | <i>PPM1D</i>  | p.E475fs                                        | 0.0284   |
| 848193-3 | <i>TP53</i>   | TP53:uc002gio.3:exon2:c.C17T:p.A6V              | 0.147826 |
| 848193-3 | <i>TP53</i>   | TP53:uc002gii.2:exon5:c.T466A:p.S156T           | 0.415758 |
| 865122-7 | <i>EZH2</i>   | EZH2:uc011kui.2:exon2:c.62dupC:p.S21fs          | 0.1619   |
| 865122-7 | <i>GATA2</i>  | GATA2:uc003ekm.3:exon4:c.813_814insTG:p.G272fs  | 0.0512   |
| 865122-7 | <i>IKZF1</i>  | IKZF1:uc003tow.4:exon6:c.658dupA:p.H219fs       | 0.0598   |
| 865122-7 | <i>PPM1D</i>  | PPM1D:uc002iyt.2:exon6:c.C1714T:p.R572X         | 0.042    |
| 865122-7 | <i>RUNX1</i>  | RUNX1:uc010gmw.1:exon5:c.C422A:p.S141X          | 0.07957  |
| 865961-3 | <i>DNMT3A</i> | DNMT3A:uc002rgd.4:exon18:c.T2114C:p.I705T       | 0.087379 |
| 865961-6 | <i>DNMT3A</i> | DNMT3A:uc002rgd.4:exon18:c.T2114C:p.I705T       | 0.189338 |
| 865961-6 | <i>PPM1D</i>  | p.Q520fs                                        | 0.0765   |
| 865961-6 | <i>TP53</i>   | TP53:uc002gii.2:exon3:c.287_289del:p.96_97del   | 0.2765   |
| 883956-5 | <i>DNMT3A</i> | DNMT3A:uc002rgd.4:exon23:c.C2644T:p.R882C       | 0.345714 |
| 883956-5 | <i>RUNX1</i>  | chr21:36231876:C-T, splicing                    | 0.397089 |
| 885798-5 | <i>TP53</i>   | TP53:uc002gii.2:exon4:c.C340T:p.R114C           | 0.372315 |
| 885798-5 | <i>TP53</i>   | chr17:7577156:C-T                               | 0.318966 |
| 888746-6 | <i>TP53</i>   | 17:7578370:C-T                                  | 0.365169 |
| 888746-6 | <i>TP53</i>   | 17:7579311:C-T                                  | 0.3187   |



|          |               |                                                       |          |
|----------|---------------|-------------------------------------------------------|----------|
| 889584-4 | <i>TP53</i>   | TP53:uc002gii.2:exon4:c.G334T:p.E112X                 | 0.375    |
| 889584-4 | <i>TP53</i>   | TP53:uc002gio.3:exon2:c.81_82insCGCGCC:p.M28delinsRAM | 0.2621   |
| 889588-6 | <i>PPM1D</i>  | p.G463fs                                              | 0.1119   |
| 889588-6 | <i>TP53</i>   | TP53:uc002gii.2:exon2:c.175_177del:p.59_59del         | 0.2975   |
| 889588-6 | <i>TP53</i>   | TP53:uc002gii.2:exon3:c.246delC:p.S82fs               | 0.295    |
| 890350-5 | <i>PPM1D</i>  | p.V464fs                                              | 0.0654   |
| 890350-5 | <i>SF3B1</i>  | SF3B1:uc002uue.3:exon14:c.C1986G:p.H662Q              | 0.176678 |
| 890350-5 | <i>TP53</i>   | TP53:uc002gii.2:exon3:c.C265T:p.R89W                  | 0.095238 |
| 895306-5 | <i>TP53</i>   | chr17:7578370:C-T                                     | 0.060284 |
| 895306-5 | <i>TP53</i>   | TP53:uc002gii.2:exon1:c.A59G:p.H20R                   | 0.070968 |
| 896109-6 | <i>TET2</i>   | TET2:uc011cez.2:exon3:c.C2935T:p.Q979X                | 0.431302 |
| 896109-6 | <i>TP53</i>   | TP53:uc002gii.2:exon3:c.G253T:p.G85C                  | 0.666667 |
| 896109-6 | <i>ZRSR2</i>  | ZRSR2:uc004cxg.4:exon2:c.C106T:p.R36X                 | 0.12037  |
| 898783-8 | <i>ASXL1</i>  | ASXL1:uc021wbw.1:exon13:c.C3202T:p.R1068X             | 0.478723 |
| 898783-8 | <i>JAK2</i>   | JAK2:uc003ziw.3:exon14:c.G1849T:p.V617F               | 0.370518 |
| 898783-8 | <i>PTPN11</i> | PTPN11:uc001ttx.3:exon13:c.C1472T:p.P491L             | 0.408    |
| 898783-8 | <i>SRSF2</i>  | SRSF2:uc010wtg.2:exon1:c.C284A:p.P95H                 | 0.450549 |
| 900169-3 | <i>ASXL1</i>  | ASXL1:uc021wbw.1:exon13:c.C3202T:p.R1068X             | 0.39886  |
| 900169-3 | <i>JAK2</i>   | JAK2:uc003ziw.3:exon14:c.G1849T:p.V617F               | 0.406667 |
| 900169-3 | <i>PTPN11</i> | PTPN11:uc001ttx.3:exon13:c.C1472T:p.P491L             | 0.35518  |
| 900169-3 | <i>SRSF2</i>  | SRSF2:uc010wtg.2:exon1:c.C284A:p.P95H                 | 0.5      |
| 902226-2 | <i>TP53</i>   | TP53:uc002gii.2:exon2:c.A182C:p.Y61S                  | 0.888889 |
| 905254-5 | <i>RUNX1</i>  | RUNX1:uc002yur.1:exon2:c.218delG:p.S73fs              | 0.1988   |
| 917999-5 | <i>ASXL1</i>  | ASXL1:uc021wbw.1:exon13:c.1888_1910del:p.H630fs       | 0.1401   |
| 920712-5 | <i>ASXL1</i>  | ASXL1:uc021wbw.1:exon13:c.C2077T:p.R693X              | 0.171765 |
| 928586-5 | <i>TP53</i>   | TP53:uc002gii.2:exon2:c.125delT:p.L42fs               | 0.3543   |
| 935979-5 | <i>PPM1D</i>  | PPM1D:uc002iyt.2:exon6:c.C1714T:p.R572X               | 0.0447   |
| 940374-6 | <i>WT1</i>    | WT1:uc001mtn.2:exon1:c.239_240insTGCT:p.L80fs         | 0.3871   |
| 941257-5 | <i>PPM1D</i>  | PPM1D:uc002iyt.2:exon6:c.A1540T:p.K514X               | 0.0814   |
| 941257-5 | <i>PPM1D</i>  | p.N448fs                                              | 0.007    |
| 941257-5 | <i>PPM1D</i>  | p.T483fs                                              | 0.0231   |
| 941257-5 | <i>TP53</i>   | TP53:uc002gii.2:exon3:c.G236A:p.C79Y                  | 0.174342 |
| 944298-3 | <i>NF1</i>    | NF1:uc002hgg.3:exon49:c.7213delA:p.I2405fs            | 0.3977   |
| 944298-3 | <i>TP53</i>   | TP53:uc002gio.3:exon2:c.T2A:p.M1K                     | 0.910761 |
| 945086-5 | <i>IDH1</i>   | IDH1:uc002vcu.3:exon4:c.G395A:p.R132H                 | 0.138482 |
| 946415-5 | <i>DNMT3A</i> | DNMT3A:uc002rgd.4:exon7:c.710delA:p.Q237fs            | 0.11     |
| 950354-3 | <i>TP53</i>   | TP53:uc002gii.2:exon2:c.125delT:p.L42fs               | 0.2961   |
| 952938-3 | <i>TP53</i>   | TP53:uc002gii.2:exon1:c.C46G:p.R16G                   | 0.806985 |
| 952938-6 | <i>TP53</i>   | TP53:uc002gii.2:exon1:c.C46G:p.R16G                   | 0.985507 |
| 955470-4 | <i>ASXL1</i>  | ASXL1:uc021wbw.1:exon13:c.1927dupG:p.G642fs           | 0.1304   |
| 955470-4 | <i>SETBP1</i> | SETBP1:uc010dni.3:exon4:c.G2608A:p.G870S              | 0.113561 |

|          |               |                                                  |          |
|----------|---------------|--------------------------------------------------|----------|
| 955470-4 | <i>U2AF1</i>  | U2AF1:uc002zda.1:exon6:c.A470C:p.Q157P           | 0.288204 |
| 955470-8 | <i>ASXL1</i>  | ASXL1:uc021wbw.1:exon13:c.1927dupG:p.G642fs      | 0.1858   |
| 955470-8 | <i>CUX1</i>   | CUX1:uc003uyx.4:exon11:c.834dupG:p.Q278fs        | 0.1008   |
| 955470-8 | <i>SETBP1</i> | SETBP1:uc010dni.3:exon4:c.G2608A:p.G870S         | 0.084337 |
| 955470-8 | <i>U2AF1</i>  | U2AF1:uc002zda.1:exon6:c.A470C:p.Q157P           | 0.434783 |
| 965417-5 | <i>TP53</i>   | TP53:uc002gig.1:exon3:c.G158A:p.W53X             | 0.357309 |
| 965857-7 | <i>PPM1D</i>  | PPM1D:uc002iyt.2:exon6:c.C1547G:p.S516X          | 0.0391   |
| 965857-7 | <i>PPM1D</i>  | p.R429fs                                         | 0.0402   |
| 965857-7 | <i>TP53</i>   | chr17:7579311:C-T                                | 0.11828  |
| 966645-8 | <i>TP53</i>   | TP53:uc002gio.3:exon2:c.G77A:p.R26H              | 0.522989 |
| 966645-8 | <i>U2AF1</i>  | U2AF1:uc002zda.1:exon6:c.G467A:p.R156H           | 0.431373 |
| 968257-1 | <i>PTPN11</i> | PTPN11:uc001ttx.3:exon13:c.G1508C:p.G503A        | 0.137255 |
| 973131-3 | <i>TP53</i>   | TP53:uc002gii.2:exon2:c.G169A:p.V57M             | 0.349866 |
| 973131-3 | <i>TP53</i>   | TP53:uc002gii.2:exon4:c.379delG:p.E127fs         | 0.3777   |
| 973680-3 | <i>DNMT3A</i> | DNMT3A:uc002rgd.4:exon11:c.1315_1316del:p.M439fs | 0.3345   |
| 973680-3 | <i>KRAS</i>   | KRAS:uc001rgq.1:exon4:c.A351C:p.K117N            | 0.861171 |
| 973680-3 | <i>PPM1D</i>  | p.N477fs                                         | 0.2132   |
| 974690-1 | <i>PPM1D</i>  | p.E540fs                                         | 0.0269   |
| 974690-1 | <i>TP53</i>   | TP53:uc002gii.2:exon2:c.A182G:p.Y61C             | 0.145394 |
| 974690-1 | <i>TP53</i>   | TP53:uc002gii.2:exon2:c.T181C:p.Y61H             | 0.134066 |
| 977695-1 | <i>TP53</i>   | TP53:uc002gio.3:exon2:c.G42A:p.W14X              | 0.804511 |
| 978451-7 | <i>KRAS</i>   | KRAS:uc001rgq.1:exon2:c.G35A:p.G12D              | 0.407328 |
| 988575-1 | <i>SRSF2</i>  | SRSF2:uc010wtg.2:exon1:c.C284A:p.P95H            | 0.445545 |
| 992670-1 | <i>GNAS</i>   | GNAS:uc002xzw.3:exon1:c.2009_2012del:p.D670fs    | 0.105    |
| 993055-3 | <i>BCOR</i>   | BCOR:uc004dep.4:exon12:c.C4537T:p.R1513X         | 0.062069 |
| 993112-2 | <i>TP53</i>   | TP53:uc002gio.3:exon2:c.G42A:p.W14X              | 0.885714 |
| 993291-1 | <i>TP53</i>   | TP53:uc002gii.2:exon3:c.A224G:p.Y75C             | 0.126806 |
| 993291-1 | <i>TP53</i>   | TP53:uc002gii.2:exon3:c.T223C:p.Y75H             | 0.105519 |
| 994371-1 | <i>TP53</i>   | TP53:uc002gii.2:exon1:c.74_77del:p.D25fs         | 0.2692   |
| 995045-8 | <i>ASXL1</i>  | ASXL1:uc021wbw.1:exon13:c.1927dupG:p.G642fs      | 0.1373   |
| 995045-8 | <i>EZH2</i>   | EZH2:uc011kui.2:exon5:c.467_473del:p.K156fs      | 0.2361   |
| 995045-8 | <i>PPM1D</i>  | p.Q520fs                                         | 0.0254   |
| 995393-2 | <i>NF1</i>    | NF1:uc002hgg.3:exon50:c.C7348T:p.R2450X          | 0.084795 |
| 995393-2 | <i>NRAS</i>   | NRAS:uc009wgu.3:exon2:c.G34T:p.G12C              | 0.133477 |
| 995393-6 | <i>NF1</i>    | NF1:uc002hgg.3:exon50:c.C7348T:p.R2450X          | 0.117506 |
| 995393-6 | <i>NF1</i>    | NF1:uc002hgg.3:exon47:c.6926_6927insAG:p.S2309fs | 0.2376   |
| 995393-6 | <i>NRAS</i>   | NRAS:uc009wgu.3:exon2:c.G35A:p.G12D              | 0.056383 |
| 995393-6 | <i>NRAS</i>   | NRAS:uc009wgu.3:exon2:c.G34T:p.G12C              | 0.199787 |
| 999001-1 | <i>ASXL1</i>  | ASXL1:uc021wbw.1:exon13:c.2270delA:p.Q757fs      | 0.3197   |
| 999001-1 | <i>PPM1D</i>  | p.G554fs                                         | 0.0335   |
| 999001-1 | <i>RUNX1</i>  | RUNX1:uc010gmw.1:exon6:c.583_584insAA:p.I195fs   | 0.3129   |

|               |               |                                                                                                  |          |
|---------------|---------------|--------------------------------------------------------------------------------------------------|----------|
| 999001-1      | <i>SRSF2</i>  | SRSF2:uc010wtg.2:exon1:c.C284A:p.P95H                                                            | 0.326255 |
| 999001-1      | <i>STAG2</i>  | STAG2:uc004eud.3:exon15:c.1394dupT:p.V465fs                                                      | 0.3      |
| AL1000A1406M9 | <i>DNMT3A</i> | DNMT3A:uc002rgd.3:exon21:c.2426delT:p.V809fs                                                     | 0.0725   |
| AL1000A1406M9 | <i>TP53</i>   | TP53:uc002gii.1:exon4:c.G418A:p.V140M                                                            | 0.443038 |
| AL1007A1413M5 | <i>NRAS</i>   | NRAS:uc009wgu.3:exon3:c.A183T:p.Q61H                                                             | 0.408163 |
| AL1007A1413M5 | <i>PPM1D</i>  | PPM1D:uc002iyt.2:exon6:c.G1618T:p.E540X                                                          | 0.465    |
| AL1017A1423M2 | <i>RUNX1</i>  | RUNX1:uc010gmv.1:exon6:c.525_526insT:p.L175fs                                                    | 0.2105   |
| AL1017A1423M2 | <i>ZRSR2</i>  | ZRSR2:uc004cxg.4:exon8:c.733delC:p.P245fs                                                        | 0.2      |
| AL1029A1435M3 | <i>PPM1D</i>  | PPM1D:uc002iyt.2:exon6:c.A1603T:p.K535X                                                          | 0.0795   |
| AL1029A1435M3 | <i>TP53</i>   | TP53:uc002gii.1:exon2:c.A187T:p.I63F                                                             | 0.146667 |
| AL1029A1435M3 | <i>TP53</i>   | TP53:uc002gii.1:exon1:c.G131A:p.C44Y                                                             | 0.162162 |
| AL1057A5172M2 | <i>DNMT3A</i> | DNMT3A:uc002rgd.3:exon23:c.G2645A:p.R882H                                                        | 0.279412 |
| AL1094A1628M4 | <i>EZH2</i>   | uc011kuh.2:exon18:c.1906-2A>G)                                                                   | 0.293542 |
| AL1094A1628M4 | <i>PPM1D</i>  | p.N448fs                                                                                         | 0.0208   |
| AL1094A1628M4 | <i>TP53</i>   | TP53:uc002gii.1:exon3:c.A340C:p.M114L                                                            | 0.343465 |
| AL1103A1637M2 | <i>PPM1D</i>  | p.N448fs                                                                                         | 0.0215   |
| AL1104A1638M9 | <i>PPM1D</i>  | p.R429fs                                                                                         | 0.3394   |
| AL1104A1638M9 | <i>TET2</i>   | TET2:uc011cez.2:exon3:c.800delC:p.T267fs                                                         | 0.1314   |
| AL1133A1669M0 | <i>TP53</i>   | TP53:uc002gii.1:exon2:c.174_175insC:p.P58fs                                                      | 0.2217   |
| AL1139A1675M9 | <i>CBL</i>    | CBL:uc001pwe.3:exon4:c.A679T:p.T227S                                                             | 0.066019 |
| AL1139A1675M9 | <i>STAG2</i>  | STAG2:uc004eud.3:exon12:c.1047_1048del:p.349_350del                                              | 0.2787   |
| AL1139A1675M9 | <i>TET2</i>   | TET2:uc011cez.2:exon3:c.C1826G:p.S609X                                                           | 0.08548  |
| AL1156A1694M0 | <i>SF3B1</i>  | SF3B1:uc002uue.3:exon14:c.A1997C:p.K666T                                                         | 0.388298 |
| AL1157A1695M7 | <i>BCOR</i>   | BCOR, splicing, uc004deo.4:exon12:c.4585+1G>A                                                    | 0.423831 |
| AL1157A1695M7 | <i>FLT3</i>   | FLT3:uc010tdn.2:exon14:c.1800_1801insCTACGTTGATTTTCAGAGAA<br>TATGAATATGA:p.D600delinsDYVDFREYEYD | 0.0868   |
| AL1157A1695M7 | <i>RUNX1</i>  | RUNX1:uc010gmv.1:exon5:c.423_424insA:p.S141fs                                                    | 0.1608   |
| AL1165A1705M8 | <i>ASXL1</i>  | ASXL1:uc021wbw.1:exon13:c.1926_1927insG:p.G642fs                                                 | 0.1404   |
| AL1165A1705M8 | <i>CEBPA</i>  | CEBPA:uc002nun.3:exon1:c.384_385insC:p.P128fs                                                    | 0.0889   |
| AL1165A1705M8 | <i>DNMT3A</i> | DNMT3A:uc002rgd.3:exon10:c.1239_1240insG:p.G413fs                                                | 0.1661   |
| AL1165A1705M8 | <i>EZH2</i>   | EZH2:uc011kui.2:exon8:c.787_788insC:p.N263fs                                                     | 0.1671   |
| AL1165A1705M8 | <i>EZH2</i>   | EZH2:uc011kui.2:exon10:c.1105_1106insC:p.T369fs                                                  | 0.2139   |
| AL1165A1705M8 | <i>PPM1D</i>  | p.G544fs                                                                                         | 0.3416   |
| AL1165A1705M8 | <i>RUNX1</i>  | RUNX1:uc010gmv.3:exon9:c.1390_1391insC:p.T464fs                                                  | 0.1212   |
| AL1165A1705M8 | <i>RUNX1</i>  | RUNX1:uc010gmv.3:exon9:c.1037_1038insC:p.R346fs                                                  | 0.2158   |
| AL1165A1705M8 | <i>RUNX1</i>  | RUNX1:uc010gmv.1:exon6:c.602_603insC:p.R201fs                                                    | 0.1141   |
| AL1165A1705M8 | <i>SH2B3</i>  | SH2B3:uc001tse.3:exon7:c.1261_1262insG:p.R421fs                                                  | 0.2044   |
| AL1165A1705M8 | <i>SRSF2</i>  | SRSF2:uc010wtg.2:exon1:c.C283G:p.P95A                                                            | 0.09009  |
| AL1165A1705M8 | <i>TET2</i>   | TET2:uc011cez.2:exon3:c.1722_1723insC:p.V574fs                                                   | 0.2096   |
| AL1165A1705M8 | <i>TET2</i>   | TET2:uc011cez.2:exon3:c.2348_2349insC:p.H783fs                                                   | 0.1991   |
| AL1218A1766M1 | <i>ASXL1</i>  | ASXL1:uc021wbw.1:exon13:c.1926_1927insG:p.G642fs                                                 | 0.1521   |
| AL1218A1766M1 | <i>DNMT3A</i> | DNMT3A:uc002rgd.3:exon23:c.G2645A:p.R882H                                                        | 0.385986 |

|               |                    |                                                                                        |          |
|---------------|--------------------|----------------------------------------------------------------------------------------|----------|
| AL1218A1766M1 | <i>NRAS</i>        | NRAS:uc009wgu.3:exon2:c.G38A:p.G13D                                                    | 0.252376 |
| AL1218A1766M1 | <i>RUNX1</i>       | RUNX1:uc010gmv.3:exon8:c.C958T:p.R320X                                                 | 0.375948 |
| AL1496A2114M0 | <i>PPM1D</i>       | p.Q510fs                                                                               | 0.0468   |
| AL1496A2114M0 | <i>PPM1D</i>       | p.N448fs                                                                               | 0.04     |
| AL1539A2169M1 | <i>PPM1D</i>       | p.D488fs                                                                               | 0.0293   |
| AL1539A2169M1 | <i>PPM1D</i>       | p.N448fs                                                                               | 0.0273   |
| AL1539A2169M1 | <i>PPM1D</i>       | p.E476fs                                                                               | 0.0255   |
| AL1539A2169M1 | <i>TP53</i>        | TP53:uc002gii.1:exon4:c.G418A:p.V140M                                                  | 0.0837   |
| AL1539A2169M1 | <i>TP53</i>        | TP53:uc002gii.1:exon1:c.C132A:p.C44X                                                   | 0.092593 |
| AL1632A2299M7 | <i>NF1</i>         | NF1:uc002hgg.3:exon54:c.C7909T:p.R2637X                                                | 0.097242 |
| AL1632A2299M7 | <i>PPM1D</i>       | p.K480fs                                                                               | 0.0334   |
| AL1632A2299M7 | <i>TP53</i>        | TP53:uc002gii.1:exon2:c.C241T:p.R81X                                                   | 0.132605 |
| AL1654A2332M0 | <i>NF1</i>         | NF1:uc002hgh.3:exon8:c.G801A:p.W267X                                                   | 0.616511 |
| AL1718A2420M6 | <i>PPM1D</i>       | p.V464fs                                                                               | 0.0458   |
| AL1718A2420M6 | <i>PPM1D</i>       | p.Q510fs                                                                               | 0.0276   |
| AL1718A2420M6 | <i>TP53</i>        | TP53:uc002gii.1:exon4:c.G443A:p.R148K                                                  | 0.425721 |
| AL1737A2447M5 | <i>KIT</i>         | KIT:uc010igr.3:exon17:c.A2447T:p.D816V                                                 | 0.455032 |
| AL1737A2447M5 | <i>NPM1</i>        | NPM1:uc003mbi.3:exon11:c.859_860insTCTG:p.L287fs                                       | 0.1667   |
| AL1737A2447M5 | <i>WT1</i>         | WT1:uc001mtm.2:exon6:c.455_456insTGACGGT:p.S152fs                                      | 0.311    |
| AL1816A3323M4 | <i>DNMT3A</i>      | DNMT3A:uc002rgd.3:exon14:c.1604_1605insACGACGACGACGGCT<br>ACCAGT;p.S535delinsYDDDDGYQS | 0.1022   |
| AL1816A3323M4 | <i>TP53</i>        | TP53:uc002jig.1:exon4:c.A394G:p.K132E                                                  | 0.294707 |
| AL1947A4439M6 | <i>DNMT3A</i>      |                                                                                        | 0.2196   |
| AL1947A4439M6 | <i>IDH1</i>        | IDH1:uc002vcu.3:exon4:c.C394T:p.R132C                                                  | 0.099675 |
| AL2061A3607M3 | <i>ASXL1</i>       | ASXL1:uc021wbw.1:exon13:c.3055_3056del:p.1019_1019del                                  | 0.148    |
| AL2158A4397M9 | <i>U2AF1</i>       | U2AF1:uc002zda.1:exon2:c.C101A:p.S34Y                                                  | 0.138408 |
| AL2213A5649M5 | <i>PTPN11</i>      | PTPN11:uc001ttx.3:exon13:c.C1472T:p.P491L                                              | 0.094595 |
| AL2285A5866M9 | <i>DNMT3A</i>      | uc002rgd.3:exon19:c.2173+2T>C                                                          | 0.828986 |
| AL2285A5866M9 | <i>ETV6</i>        | ETV6:uc001qzz.3:exon6:c.1146delC:p.N382fs                                              | 0.2345   |
| AL2285A5866M9 | <i>SRSF2</i>       | SRSF2:uc010wtg.2:exon1:c.C284T:p.P95L                                                  | 0.442155 |
| AL2285A5866M9 | <i>TET2</i>        | TET2:uc011cez.2:exon3:c.2978_2979insT:p.S993fs                                         | 0.2179   |
| AL2481A5022M5 | <i>PPM1D</i>       | p.Q510fs                                                                               | 0.0211   |
| AL2481A5022M5 | <i>PPM1D</i>       | p.Q510fs                                                                               | 0.0289   |
| AL2510A5446M9 | <i>ASXL1</i>       | ASXL1:uc021wbw.1:exon13:c.1926_1927insG:p.G642fs                                       | 0.1475   |
| AL2510A5446M9 | <i>BCOR</i>        | BCOR:uc004dep.4:exon13:c.4709_4710del:p.1570_1570del                                   | 0.681    |
| AL2510A5446M9 | <i>PTPN11</i>      | PTPN11:uc001ttx.3:exon13:c.C1472T:p.P491L                                              | 0.449568 |
| AL2510A5446M9 | <i>SRSF2</i>       | SRSF2:uc010wtg.2:exon1:c.C284T:p.P95L                                                  | 0.485887 |
| AL2510A5446M9 | <i>STAG2;STAG2</i> | STAG2:uc004eud.3:exon16:c.1418_1419insA:p.L473fs                                       | 0.3189   |
| AL2510A5446M9 | <i>TET2</i>        | TET2:uc011cez.2:exon3:c.742_743insA:p.E248fs                                           | 0.2775   |
| AL2547A6289M9 | <i>DNMT3A</i>      | DNMT3A:uc002rgd.3:exon14:c.G1627T:p.G543C                                              | 0.057332 |
| AL2621A6897M6 | <i>TP53</i>        | TP53:uc002gii.1:exon1:c.G42A:p.W14X                                                    | 0.428571 |
| AL2621A6897M6 | <i>TP53</i>        | TP53:uc010vug.2:exon5:c.G556A:p.V186I                                                  | 0.415179 |

|               |               |                                                                                                                                         |          |
|---------------|---------------|-----------------------------------------------------------------------------------------------------------------------------------------|----------|
| AL2709A6501M7 | <i>DNMT3A</i> | DNMT3A:uc002rgd.3:exon23:c.G2645A:p.R882H                                                                                               | 0.057915 |
| AL2709A6501M7 | <i>PPM1D</i>  | p.T483fs                                                                                                                                | 0.0451   |
| AL2709A6501M7 | <i>TP53</i>   | TP53:uc002gii.1:exon2:c.G250A:p.V84M                                                                                                    | 0.83642  |
| AL2724A6516M9 | <i>FLT3</i>   | FLT3:uc010tdn.2:exon14:c.1836_1837insCAGAGAATATGAATATGATCTCAAATGGGAGTTTCCAAGAGAAAATTTAGAGTT:p.F612delinsFREYEYDLKWEFPRENLEF             | 0.1697   |
| AL2735A6530M7 | <i>PPM1D</i>  | p.F534fs                                                                                                                                | 0.3471   |
| AL2736A6531M4 | <i>NRAS</i>   | NRAS:uc009wgu.3:exon3:c.C181A:p.Q61K                                                                                                    | 0.261456 |
| AL2743A6541M8 | <i>DNMT3A</i> | DNMT3A:uc002rgd.3:exon19:c.2316delT:p.F772fs                                                                                            | 0.1083   |
| AL2743A6541M8 | <i>PPM1D</i>  | p.S541fs                                                                                                                                | 0.0638   |
| AL2826A6672M2 | <i>TET2</i>   | TET2:uc011cez.2:exon6:c.C3828A:p.Y1276X                                                                                                 | 0.180617 |
| AL2826A6672M2 | <i>TP53</i>   | TP53:uc002gii.1:exon2:c.A218G:p.Y73C                                                                                                    | 0.223118 |
| AL2826A6672M2 | <i>U2AF1</i>  | U2AF1:uc002zda.1:exon6:c.A470C:p.Q157P                                                                                                  | 0.117296 |
| AL2829A6675M3 | <i>WT1</i>    | WT1:uc001mtm.2:exon6:c.C455A:p.S152X                                                                                                    | 0.147497 |
| AL2830A6676M0 | <i>ASXL1</i>  | ASXL1:uc021wbw.1:exon13:c.1926_1927insG:p.G642fs                                                                                        | 0.1199   |
| AL2831A6677M7 | <i>FLT3</i>   | FLT3:uc010tdn.2:exon14:c.1779_1780insAGCCCCGGGGAAGTTGA:p.D593delinsEAPGEVD                                                              | 0.2245   |
| AL2831A6677M7 | <i>KDM6A</i>  | KDM6A:uc011mkz.2:exon18:c.C2128T:p.R710X                                                                                                | 0.721212 |
| AL2831A6677M7 | <i>RAD21</i>  | RAD21:uc003yod.3:exon13:c.G1657T:p.E553X                                                                                                | 0.412017 |
| AL2831A6677M7 | <i>RUNX1</i>  | RUNX1:uc010gmw.1:exon6:c.C610T:p.R204X                                                                                                  | 0.306667 |
| AL2831A6677M7 | <i>RUNX1</i>  | RUNX1:uc010gmw.1:exon5:c.495_496insGG:p.G165fs                                                                                          | 0.2066   |
| AL2831A6677M7 | <i>SRSF2</i>  | SRSF2:uc010wtg.2:exon1:c.C284A:p.P95H                                                                                                   | 0.335766 |
| AL2832A6678M4 | <i>PPM1D</i>  | p.N448fs                                                                                                                                | 0.0227   |
| AL2832A6678M4 | <i>TP53</i>   | TP53:uc002gii.1:exon2:c.T185A:p.L62H                                                                                                    | 0.419729 |
| AL2905A6801M8 | <i>DNMT3A</i> | DNMT3A:uc002rgd.3:exon23:c.C2644T:p.R882C                                                                                               | 0.132222 |
| AL2905A6801M8 | <i>DNMT3A</i> | DNMT3A:uc002rgd.3:exon7:c.C852A:p.Y284X                                                                                                 | 0.133178 |
| AL2905A6801M8 | <i>PPM1D</i>  | p.N448fs                                                                                                                                | 0.025    |
| AL2905A6801M8 | <i>TP53</i>   | TP53:uc002gii.1:exon1:c.G71C:p.R24P                                                                                                     | 0.158205 |
| AL2905A6801M8 | <i>TP53</i>   | TP53:uc002gii.1:exon1:c.59delC:p.P20fs                                                                                                  | 0.1581   |
| AL2905A6849M2 | <i>DNMT3A</i> | DNMT3A:uc002rgd.3:exon7:c.C852A:p.Y284X                                                                                                 | 0.406977 |
| AL2905A6849M2 | <i>TP53</i>   | TP53:uc002gii.1:exon1:c.G71C:p.R24P                                                                                                     | 0.452713 |
| AL2905A6849M2 | <i>TP53</i>   | TP53:uc002gii.1:exon1:c.59delC:p.P20fs                                                                                                  | 0.3114   |
| AL2937A6858M3 | <i>TP53</i>   | TP53:uc002gii.1:exon3:c.C346T:p.R116W                                                                                                   | 0.051447 |
| AL2938A6859M0 | <i>SH2B3</i>  | SH2B3:uc001tse.3:exon7:c.1261_1262insG:p.R421fs                                                                                         | 0.479167 |
| AL2938A6859M0 | <i>TP53</i>   | TP53:uc002gii.1:exon4:c.G415A:p.E139K                                                                                                   | 0.403877 |
| AL2947A6868M0 | <i>PPM1D</i>  | p.E459fs                                                                                                                                | 0.4134   |
| AL2950A6871M9 | <i>BCOR</i>   | BCOR:uc004dep.4:exon7:c.3410_3411del:p.1137_1137del                                                                                     | 0.415    |
| AL2950A6871M9 | <i>DNMT3A</i> | DNMT3A:uc002rgd.3:exon23:c.G2645A:p.R882H                                                                                               | 0.303303 |
| AL2950A6871M9 | <i>FLT3</i>   | FLT3:uc010tdn.2:exon14:c.1796_1797insGGGTACAGGTGACCGGCTCCTCAGATAATGAGTACTTCTACGTTGATTTCAGAGAATATGAAT:p.Y599delinsWVQVTGSSDNEYFYVDFREYFY | 0.1057   |
| AL2950A6871M9 | <i>RUNX1</i>  | RUNX1:uc010gmv.3:exon8:c.903delC:p.P301fs                                                                                               | 0.3369   |
| AL2950A6871M9 | <i>SRSF2</i>  | SRSF2:uc010wtg.2:exon1:c.C284A:p.P95H                                                                                                   | 0.25     |
| AL2957A6880M3 | <i>ASXL1</i>  | ASXL1:uc021wbw.1:exon13:c.A2734T:p.K912X                                                                                                | 0.242826 |

|               |               |                                                            |          |
|---------------|---------------|------------------------------------------------------------|----------|
| AL2957A6880M3 | <i>FLT3</i>   | FLT3:uc001urw.3:exon20:c.2508_2510del:p.836_837del         | 0.0663   |
| AL2957A6880M3 | <i>TET2</i>   | TET2:uc011cez.2:exon3:c.2320_2335del:p.774_779del          | 0.4067   |
| AL2957A6880M3 | <i>TET2</i>   | TET2:uc011cez.2:exon3:c.2415delT:p.C805fs                  | 0.1366   |
| AL2957A6880M3 | <i>ZRSR2</i>  | ZRSR2:uc004cxg.4:exon2:c.C94T:p.Q32X                       | 0.498077 |
| AL2959A6882M7 | <i>ASXL1</i>  | ASXL1:uc021wbw.1:exon13:c.C1773G:p.Y591X                   | 0.466192 |
| AL2959A6882M7 | <i>NF1</i>    | NF1:uc002hgg.3:exon46:c.6853_6854insA:p.Y2285_N2286delinsX | 0.1368   |
| AL2966A6889M5 | <i>FLT3</i>   | exon15:c.1837>ATCTCAAATGGGAGTTTCCAAGAGAAAATTAGAGTTTG)      | 0.1186   |
| AL2966A6889M5 | <i>NPM1</i>   | NPM1:uc003mbi.3:exon11:c.860_861insCTGC:p.L287fs           | 0.1828   |
| AL2966A6889M5 | <i>WT1</i>    | WT1:uc001mtm.2:exon6:c.422_423insC:p.R141fs                | 0.236    |
| AL2971A6909M1 | <i>ASXL1</i>  | ASXL1:uc021wbw.1:exon13:c.2384delC:p.S795fs                | 0.0546   |
| AL2971A6909M1 | <i>JAK2</i>   | JAK2:uc003ziw.3:exon14:c.G1849T:p.V617F                    | 0.294043 |
| AL3097A7164M2 | <i>ASXL1</i>  | ASXL1:uc021wbw.1:exon13:c.1926_1927insG:p.G642fs           | 0.1386   |
| AL3097A7164M2 | <i>GATA2</i>  | GATA2:uc003ekm.3:exon6:c.T1075G:p.L359V                    | 0.351548 |
| AL3097A7164M2 | <i>JAK2</i>   | JAK2:uc003ziw.3:exon14:c.G1849T:p.V617F                    | 0.42953  |
| AL641A743M9   | <i>IDH1</i>   | IDH1:uc002vcu.3:exon4:c.G395A:p.R132H                      | 0.072917 |
| AL641A743M9   | <i>WT1</i>    | WT1:uc001mtm.2:exon6:c.456_457insCGGTC:p.S152fs            | 0.2045   |
| AL658A777M8   | <i>BCOR</i>   | BCOR:uc004deq.4:exon4:c.613_614insAC:p.P205fs              | 0.1009   |
| AL658A777M8   | <i>IDH2</i>   | IDH2:uc002box.3:exon4:c.G419A:p.R140Q                      | 0.5      |
| AL658A777M8   | <i>PHF6</i>   | PHF6:uc004exk.3:exon9:c.C903G:p.Y301X                      | 0.15     |
| AL658A777M8   | <i>RUNX1</i>  | RUNX1:uc010gmv.3:exon9:c.1252_1277del:p.418_426del         | 0.0845   |
| AL658A777M8   | <i>SF3B1</i>  | SF3B1:uc002uue.3:exon15:c.A2098G:p.K700E                   | 0.229167 |
| AL691A843M7   | <i>PPM1D</i>  | PPM1D:uc002iyt.2:exon6:c.1527delC:p.D509fs                 | 0.1081   |
| AL698A857M3   | <i>TP53</i>   | TP53:uc002gii.1:exon1:c.T130A:p.C44S                       | 0.743902 |
| AL749A960M6   | <i>TET2</i>   | TET2:uc011cez.2:exon9:c.4147_4177del:p.1383_1393del        | 0.2256   |
| AL749A960M6   | <i>TET2</i>   | TET2:uc011cez.2:exon3:c.1671_1672del:p.557_558del          | 0.3367   |
| AL762A5244M5  | <i>ASXL1</i>  | ASXL1:uc021wbw.1:exon13:c.2852_2853insTCTTCAC:p.D951fs     | 0.2951   |
| AL762A5244M5  | <i>DNMT3A</i> | DNMT3A:uc002rgd.3:exon23:c.C2644T:p.R882C                  | 0.441111 |
| AL762A5244M5  | <i>NRAS</i>   | NRAS:uc009wgu.3:exon2:c.G35A:p.G12D                        | 0.386412 |
| AL762A5244M5  | <i>RUNX1</i>  | RUNX1:uc010gmv.1:exon5:c.493_494insAGGGGT:p.G165delinsRGG  | 0.3092   |
| AL762A5521M9  | <i>ASXL1</i>  | ASXL1:uc021wbw.1:exon13:c.2852_2853insTCTTCAC:p.D951fs     | 0.3016   |
| AL762A5521M9  | <i>DNMT3A</i> | DNMT3A:uc002rgd.3:exon23:c.C2644T:p.R882C                  | 0.483787 |
| AL762A5521M9  | <i>NRAS</i>   | NRAS:uc009wgu.3:exon2:c.G35A:p.G12D                        | 0.74197  |
| AL762A5521M9  | <i>RUNX1</i>  | RUNX1:uc010gmv.1:exon5:c.493_494insAGGGGT:p.G165delinsRGG  | 0.3248   |
| AL762A6961M4  | <i>ASXL1</i>  | ASXL1:uc021wbw.1:exon13:c.2852_2853insTCTTCAC:p.D951fs     | 0.3108   |
| AL762A6961M4  | <i>DNMT3A</i> | DNMT3A:uc002rgd.3:exon23:c.C2644T:p.R882C                  | 0.513774 |
| AL762A6961M4  | <i>NRAS</i>   | NRAS:uc009wgu.3:exon2:c.G35A:p.G12D                        | 0.740107 |
| AL762A6961M4  | <i>RUNX1</i>  | RUNX1:uc010gmv.1:exon5:c.493_494insAGGGGT:p.G165delinsRGG  | 0.3018   |
| AL762A986M8   | <i>DNMT3A</i> | DNMT3A:uc002rgd.3:exon23:c.C2644T:p.R882C                  | 0.352941 |
| AL770A1002M9  | <i>EZH2</i>   | EZH2:uc011kui.2:exon8:c.G863A:p.R288Q                      | 0.237288 |
| AL781A1024M0  | <i>KRAS</i>   | KRAS:uc001rgq.1:exon4:c.A351C:p.K117N                      | 0.095238 |
| AL792A1046M1  | <i>TP53</i>   | TP53:uc002gii.1:exon1:c.C132A:p.C44X                       | 0.625767 |

|              |               |                                                                                                                                                                                |          |
|--------------|---------------|--------------------------------------------------------------------------------------------------------------------------------------------------------------------------------|----------|
| AL832A1180M1 | <i>TET2</i>   | TET2:uc011cez.2:exon3:c.C1858T:p.Q620X\                                                                                                                                        | 0.896552 |
| AL852A1221M0 | <i>DNMT3A</i> | DNMT3A:uc002rgd.3:exon23:c.C2644T:p.R882C                                                                                                                                      | 0.470588 |
| AL852A1221M0 | <i>NRAS</i>   | NRAS:uc009wgu.3:exon2:c.G38T:p.G13V                                                                                                                                            | 0.088235 |
| AL852A1221M0 | <i>PTPN11</i> | PTPN11:uc001ttx.3:exon3:c.G179T:p.G60V                                                                                                                                         | 0.148148 |
| AL852A1221M0 | <i>SETBP1</i> | SETBP1:uc010dni.3:exon4:c.G2602T:p.D868Y                                                                                                                                       | 0.401515 |
| AL876A1276M3 | <i>TP53</i>   | TP53:uc002gii.1:exon2:c.T188C:p.I63T                                                                                                                                           | 0.142857 |
| AL876A4637M1 | <i>TP53</i>   | TP53:uc002gii.1:exon2:c.T188C:p.I63T                                                                                                                                           | 0.593482 |
| AL885A1285M3 | <i>ASXL1</i>  | ASXL1:uc021wbw.1:exon13:c.2263delG:p.G755fs                                                                                                                                    | 0.1989   |
| AL885A1285M3 | <i>IDH1</i>   | IDH1:uc002vcu.3:exon4:c.G395A:p.R132H                                                                                                                                          | 0.470588 |
| AL885A1285M3 | <i>RUNX1</i>  | RUNX1:uc010gmw.1:exon6:c.567_568insA:p.Y189_H190delinsX                                                                                                                        | 0.2235   |
| AL885A1285M3 | <i>SRSF2</i>  | SRSF2:uc010wtg.2:exon1:c.284_285insGCC:p.P95delinsRP                                                                                                                           | 0.2566   |
| AL909A1309M3 | <i>ASXL1</i>  | ASXL1:uc021wbw.1:exon13:c.1926_1927insG:p.G642fs                                                                                                                               | 0.1333   |
| AL909A1309M3 | <i>NRAS</i>   | NRAS:uc009wgu.3:exon2:c.G35A:p.G12D                                                                                                                                            | 0.333333 |
| AL909A1309M3 | <i>TET2</i>   | TET2:uc011cez.2:exon3:c.C1654T:p.Q552X                                                                                                                                         | 0.450292 |
| AL909A1309M3 | <i>TET2</i>   | TET2:uc011cez.2:exon3:c.C2809T:p.Q937X                                                                                                                                         | 0.428571 |
| AL927A1333M5 | <i>ASXL1</i>  | ASXL1:uc021wbw.1:exon13:c.C2077T:p.R693X                                                                                                                                       | 0.389937 |
| AL927A1333M5 | <i>CBL</i>    | CBL:uc001pwe.3:exon8:c.T1111C:p.Y371H                                                                                                                                          | 0.382979 |
| AL927A1333M5 | <i>CBL</i>    | CBL:uc001pwe.3:exon9:c.C1257G:p.C419W                                                                                                                                          | 0.487179 |
| AL927A1333M5 | <i>EZH2</i>   | EZH2:uc011kui.2:exon7:c.716_717insC:p.E239fs                                                                                                                                   | 0.1458   |
| AL927A1333M5 | <i>U2AF1</i>  | U2AF1:uc002zda.1:exon6:c.A470C:p.Q157P                                                                                                                                         | 0.433333 |
| AL955A1361M1 | <i>ZRSR2</i>  | uc004cxg.4:exon9:c.827+1G>T                                                                                                                                                    | 0.0625   |
| AL962A1368M0 | <i>ASXL1</i>  | ASXL1:uc021wbw.1:exon13:c.1926_1927insG:p.G642fs                                                                                                                               | 0.178    |
| AL962A1368M0 | <i>CBL</i>    | CBL:uc001pwe.3:exon8:c.T1111C:p.Y371H                                                                                                                                          | 0.122449 |
| AL962A1368M0 | <i>EZH2</i>   | EZH2:uc011kuh.2:exon16:c.1848delG:p.G616fs                                                                                                                                     | 0.3298   |
| AL962A1368M0 | <i>SETBP1</i> | SETBP1:uc010dni.3:exon4:c.G2608A:p.G870S                                                                                                                                       | 0.494565 |
| AL962A1368M0 | <i>SRSF2</i>  | SRSF2:uc010wtg.2:exon1:c.C284T:p.P95L                                                                                                                                          | 0.513158 |
| AL965A1371M8 | <i>DNMT3A</i> | DNMT3A:uc002rgd.3:exon23:c.C2644T:p.R882C                                                                                                                                      | 0.313725 |
| AL974A5715M6 | <i>KIT</i>    | KIT:uc010igr.3:exon17:c.A2447T:p.D816V                                                                                                                                         | 0.186638 |
| AL980A1386M0 | <i>GATA2</i>  | GATA2:uc003ekm.3:exon4:c.T756G:p.Y252X                                                                                                                                         | 0.162264 |
| AL980A1386M0 | <i>NRAS</i>   | NRAS:uc009wgu.3:exon2:c.G38A:p.G13D                                                                                                                                            | 0.163043 |
| AL980A5945M5 | <i>FLT3</i>   | FLT3:uc010tdn.2:exon14:c.1801_1802insGAAAGCCAGCTACAGATG<br>GTACAGGTGACCGGCTCCTCAGATAATGAGTACTTCTACGTTGAT<br>TTCAGAGAATATGAATATGAT:p.L601delinsESQLQMVQVTGSSDNE<br>YFYVDFREYEDL | 0.2667   |
| AL980A5945M5 | <i>GATA2</i>  | GATA2:uc003ekm.3:exon4:c.T756G:p.Y252X                                                                                                                                         | 0.220377 |
| AL980A5945M5 | <i>NPM1</i>   | NPM1:uc003mbi.3:exon11:c.861_862insTGCT:p.L287fs                                                                                                                               | 0.201    |
| AL997A1403M3 | <i>RUNX1</i>  | RUNX1:uc010gmw.1:exon4:c.273_274insGGCGAGCTGGTGCG:p.R9<br>1fs                                                                                                                  | 0.2308   |
| AL997A1403M3 | <i>WT1</i>    | WT1:uc001mtm.2:exon8:c.C697T:p.R233W                                                                                                                                           | 0.084746 |
| BM-15-2015   | <i>KRAS</i>   | KRAS:uc001rgq.1:exon2:c.G35C:p.G12A                                                                                                                                            | 0.102804 |
| BM-15-2015   | <i>NRAS</i>   | NRAS:uc009wgu.3:exon2:c.G37C:p.G13R                                                                                                                                            | 0.170996 |
| BM-15-2015   | <i>TP53</i>   | TP53:uc002gig.1:exon3:c.C321A:p.Y107X                                                                                                                                          | 0.971564 |
